# Supplementary material for: Systematic evaluation of error rates and causes in short samples in next-generation sequencing
Source: PubMed Central journal article supplement (PMC6053417; doi:10.1038/s41598-018-29325-6), 2018-07-19
Supplement: 41598_2018_29325_MOESM1_ESM.pdf [file 41598_2018_29325_MOESM1_ESM.pdf]

## Supplementary Data

### Systematic evaluation of error rates and causes in short samples in next-generation sequencing

Franziska Pfeiffer, Carsten Gröber, Michael Blank, Kristian Händler, Marc Beyer, Joachim L. Schultze, and Günter Mayer\*

For all tables, yellow indicates substitutions, green insertions, and turquoise deletions.

**Table S1: Original sequence and 25 most frequent mutations of C12\_T\_PWO**

| Sequence                                            | Sequence count |
|-----------------------------------------------------|----------------|
| <b>GTTGGAAGCGACGGGACGGTAAGGCTTGGGCCCAAGGAGTG</b>    | <b>982317</b>  |
| G <b>G</b> TTGGAAGCGACGGGACGGTAAGGCTTGGGCCCAAGGAGTG | 4753           |
| <b>T</b> TTGGAAGCGACGGGACGGTAAGGCTTGGGCCCAAGGAGTG   | 4240           |
| GTTGGAAGCGACGGGACGGTA <b>G</b> GGCTTGGGCCCAAGGAGTG  | 3792           |
| GTTGGAAGCGACGGGACGGTAAGGCTT <b>G</b> CCCAAGGAGTG    | 3722           |
| GTTGGAAGCGAC <b>G</b> ACGGTAAGGCTTGGGCCCAAGGAGTG    | 3515           |
| GTTGGAAGCGACGGGACGGTAAGGCTTGGGCC <b>C</b> AAGGAGTG  | 2732           |
| <b>T</b> TTGGAAGCGACGGGACGGTAAGGCTTGGGCCCAAGGAGTG   | 2226           |
| GTTGGAAGCGACGGGAC <b>G</b> TAAGGCTTGGGCCCAAGGAGTG   | 1970           |
| GTTGGA <b>A</b> AGCGACGGGACGGTAAGGCTTGGGCCCAAGGAGTG | 1943           |
| GTTGGAAGCGACGGGACGGT <b>A</b> GCTTGGGCCCAAGGAGTG    | 1886           |
| GTT <b>G</b> AAGCGACGGGACGGTAAGGCTTGGGCCCAAGGAGTG   | 1727           |
| GTT <b>G</b> AAGCGACGGGACGGTAAGGCTTGGGCCCAAGGAGTG   | 1711           |
| GTTGGAAGCGACGGG <b>G</b> ACGGTAAGGCTTGGGCCCAAGGAGTG | 1688           |
| GTTGG <b>C</b> AAGCGACGGGACGGTAAGGCTTGGGCCCAAGGAGTG | 1641           |
| GTTGGAAGCGACGGGACGGTAAGG <b>C</b> TGGGCCCAAGGAGTG   | 1590           |
| GTTGGAAGCGACGGGACGGTAAGGCTTGGGCC <b>C</b> CAAGGAGTG | 1412           |
| GTTGGAAGCGACGG <b>C</b> CGTAAGGCTTGGGCCCAAGGAGTG    | 1319           |
| GTTGGAAGCGACGGGACGGTAAGGCTTGGGCC <b>C</b> CAAGGAGTG | 1301           |
| GTTGGAAGCGACGGGACGGTAAGGCTTGGGCC <b>C</b> CAAGGAGTG | 1291           |
| GTTGGAAGCGACGGGACGGTAA <b>G</b> CTTGGGCCCAAGGAGTG   | 1239           |
| GTTGGAAGCGACGGGACGGTAAGGCT <b>G</b> GGGCCCAAGGAGTG  | 1193           |
| GTTGGAAGCGACGGGACGGTAAGGCTTGGGCC <b>C</b> AAGGAGTG  | 1137           |
| GTTGGAAGCGACGGGACGGT <b>G</b> AGGCTTGGGCCCAAGGAGTG  | 1123           |
| GTTGGAAGCGACGGG <b>A</b> GGTAAGGCTTGGGCCCAAGGAGTG   | 1085           |
| GTTGGAAGCGACGGGACGGTAAG <b>G</b> TGGGCCCAAGGAGTG    | 1059           |

**Table S2: Original sequence and 25 most frequent mutations of C12\_T\_Taq**

| Sequence                                            | Sequence count |
|-----------------------------------------------------|----------------|
| <b>GTTGGAAGCGACGGGACGGTAAGGCTTGGGCCCAAGGAGTG</b>    | <b>2990041</b> |
| G <b>G</b> TTGGAAGCGACGGGACGGTAAGGCTTGGGCCCAAGGAGTG | 13977          |
| GTTGGAAGCGACGGGACGGTA <b>G</b> GGCTTGGGCCCAAGGAGTG  | 12302          |
| <b>T</b> TTGGAAGCGACGGGACGGTAAGGCTTGGGCCCAAGGAGTG   | 11493          |
| GTTGGAAGCGACGGGACGGTAAGGCTT <b>G</b> CCCAAGGAGTG    | 11343          |
| GTTGGAAGCGAC <b>G</b> ACGGTAAGGCTTGGGCCCAAGGAGTG    | 10431          |

|                                            |      |
|--------------------------------------------|------|
| GTTGGAAGCGACGGGACGGTAAGGCTTGGGCCCAAGGAGTG  | 7847 |
| GTCGAAGCGACGGGACGGTAAGGCTTGGGCCCAAGGAGTG   | 6353 |
| GTTGGAAGCGACGGGACGGTAAGGCTTGGGCCCAAGGAGTG  | 6098 |
| GTTGGAAGCGACGGGACGTAAGGCTTGGGCCCAAGGAGTG   | 5541 |
| GTTGGAAGCGACGGGACGGTAAGGCTTGGGCCCAAGGAGTG  | 5406 |
| GTTGGAAGCGACGGGACGGTAAGGCTTGGGCCCAAGGAGTG  | 5179 |
| GTTGGAGCGACGGGACGGTAAGGCTTGGGCCCAAGGAGTG   | 5091 |
| GTTGGAAGCGACGGGACGGTAGGCTTGGGCCCAAGGAGTG   | 5059 |
| GTTGGCAAGCGACGGGACGGTAAGGCTTGGGCCCAAGGAGTG | 4909 |
| GTTGGAAGCGACGGGACGGTAAGGCTTGGGCCCAAGGAGTG  | 4721 |
| GTTGGAAGCGACGGGACGGTAAGGCTGGGCCCAAGGAGTG   | 4541 |
| GTTGGAAGCGACGGGACGGTGAGGCTTGGGCCCAAGGAGTG  | 4053 |
| GCTGGAAGCGACGGGACGGTAAGGCTTGGGCCCAAGGAGTG  | 3972 |
| GTTGGAAGCGACGGGACGGTAAGGCTTGGGCCCAAGGAGTG  | 3948 |
| GTTGGAAGCGACGGGACGGTAAGGCTGGGCCCAAGGAGTG   | 3914 |
| GTTGGAAGCGACGGGACGGTAAGGCTTGGGCCCAAGGAGTG  | 3772 |
| GTTGGAAGCGACGGGACGGTAAGGCTTGGGCCCAAGGAGTG  | 3694 |
| GTTGGAAGCGACGGGACGGTAAGGCTTGGGCCCAAGGAGTG  | 3635 |
| GTTGGAAGCGACGGGACGGTAAGGCTTGGGCCCAAGGAGTG  | 3560 |
| GTTGGAAGCGACGGGACGGTAAGGCTTGGGCCCAAGGAGTG  | 3536 |

**Table S3: Original sequence and 25 most frequent mutations of C12\_T\_w/o**

| Sequence                                         | Sequence count |
|--------------------------------------------------|----------------|
| <b>GTTGGAAGCGACGGGACGGTAAGGCTTGGGCCCAAGGAGTG</b> | <b>1640067</b> |
| GTTGGAAGCGACGGGACGGTAAGGCTTGGGCCCAAGGAGTG        | 7565           |
| GTTGGAAGCGACGGGACGGTAAGGCTTGGGCCCAAGGAGTG        | 5878           |
| GGTGGGAAGCGACGGGACGGTAAGGCTTGGGCCCAAGGAGTG       | 5444           |
| TTGGAAGCGACGGGACGGTAAGGCTTGGGCCCAAGGAGTG         | 4726           |
| GTTGGAAGCGACGGGACGGTAAGGCTTGGGCCCAAGGAGTG        | 4683           |
| GTTGGAAGCGACGGGACGGTAGGCTTGGGCCCAAGGAGTG         | 4033           |
| GTTGGAAGCGACGGGACGGTAAGGCTTGGGCCCAAGGAGTG        | 3930           |
| GTTGGAAGCGACGGGACGGTAAGGCTTGGGCCCAAGGAGTGC       | 3777           |
| GTTGGAAGCGACGGGACGGTAAGGCTGGGCCCAAGGAGTG         | 3700           |
| GTTGGAAGCGACGGGACGGTAAGGCTTGGGCCCAAGGAGTG        | 3346           |
| GTTGGAAGCGACGGGACGGTAAGGCTTGGGCCCAAGGAGTG        | 3342           |
| GTTGGAAGCGACGGGACGGTAAGGCTTGGGCCCAAGGAGTG        | 3119           |
| GTTGGAAGCGACGGGACGGTAAGGCTTGGGCCCAAGGAGT         | 2986           |
| GTTGGAAGCGACGGGACGGTAAGGCTTGGGCCCAAGGATG         | 2715           |
| GTTGGAAGCGACGGGACGGTAAGGCTTGGGCCCAAGGAGTG        | 2713           |
| GTTGGAAGCGACGGGACGGTAAGGCTTGGGCCCAAGGAGTG        | 2659           |
| GTTGGAAGCGACGGGACGGTAAGGCTTGGGCCCAAGGAGTG        | 2635           |
| GTTGGAAGCGACGGGACGGTAAGGCTTGGGCCCAAGGAGTG        | 2609           |
| GTTGGAGCGACGGGACGGTAAGGCTTGGGCCCAAGGAGTG         | 2500           |
| TTTGGGAAGCGACGGGACGGTAAGGCTTGGGCCCAAGGAGTG       | 2437           |
| GTTGGAAGCGACGGGACGGTAAGGCTTGGGCCCAAGGAGTG        | 1991           |
| GTTGGAAGCGACGGGACGGTAAGGCTTGGGCCCAAGGAGTG        | 1989           |
| GTCGAAGCGACGGGACGGTAAGGCTTGGGCCCAAGGAGTG         | 1842           |
| GTTGGCAAGCGACGGGACGGTAAGGCTTGGGCCCAAGGAGTG       | 1839           |





|                               |       |
|-------------------------------|-------|
| GGGGAAAATTTTCCCGGGGAAAC       | 28885 |
| GGGAAAATTTTCCCGGGGAAAATTTTCC  | 27528 |
| GGGGAAAATTTTCCCGGGGAAAATTTTCC | 26734 |
| GGGGAAAATTTTCCCGGGGAAAATTTTCC | 25567 |
| GGGGAAAATTTTCCCGGGGAAATTTTCC  | 25363 |
| GGGGAAAATTTTCCCGGGAAAATTTTCC  | 22129 |
| GGGGAAAATTTTCCCGGGGAAATTTTCC  | 20528 |
| GGGGAAAATTTTCCCGGGGAAAATTTTCC | 18488 |
| GGGGAAAATTTTCCCGGGGAAATTTTCC  | 14789 |
| GGGGAAATTTTCCCGGGGAAAATTTTCC  | 13789 |
| GGGGAAAATTTTCCCGGGGAAAATTTCC  | 13618 |
| GGGGAAAATTTTCCCGGGGAAAATTTCC  | 12188 |
| GGGGAAAATTTTCCCGGGGAAAATTTCC  | 11202 |
| GGGGAAAATTTTCCCGGGGAAAATTTCC  | 10651 |
| GGGGAAAATTTTCCCGGGGAAATTTTCC  | 9828  |
| GGGGAAAATTTTCCCGGGGTAATTTTCC  | 9817  |
| GGGGAAAATTTTCCCGGGGAAAATTTCC  | 9097  |
| GGGGAAAATTTTCCCGGGGAAAATTTCC  | 8683  |
| GGGGAAAATTTTCCCGAGGAAAATTTTCC | 8659  |
| GGGGATAATTTTCCCGGGGAAAATTTCC  | 8512  |
| TGGGAAAATTTTCCCGGGGAAAATTTCC  | 8250  |
| GGGGAAAATTTTCCCGTGGAAAATTTTCC | 8185  |
| GGGGAAAATTTTCCCGGGGATAATTTTCC | 8177  |

**Table S8: Original sequence and 25 most frequent mutations of FT2\_G4A4T4C4\_II**

| Sequence                             | Sequence count |
|--------------------------------------|----------------|
| <b>GGGGAAAATTTTCCCGGGGAAAATTTTCC</b> | <b>6549166</b> |
| GGGGAAAATTTTCCCGGGGAAAG              | 45606          |
| GGGGAAAATTTTCCCGGGGAAAATTTTCC        | 25874          |
| GGGAAAATTTTCCCGGGGAAAATTTTCC         | 25002          |
| GGGGAAAATTTTCCCGGGGAAATTTTCC         | 24447          |
| GGGGAAAATTTTCCCGGGGAAAATTTTCC        | 23700          |
| GGGGAAAATTTTCCCGGGAAAATTTTCC         | 20951          |
| GGGGAAAATTTTCCCGGGGAAAC              | 20084          |
| GGGTAAAATTTTCCCGGGGAAAATTTTCC        | 19289          |
| GGGGAAAATTTTCCCGGGGAAATTTTCC         | 18918          |
| GGGGAAAATTTTCCCGGGGAAAATTTTCC        | 16348          |
| GGGGAAAATTTTCCCGGGGAAAATTTTACC       | 15108          |
| GGGGAAAATTTTCCCGGGGAAAG              | 14713          |
| GGGGAAAATTTTCCCGGGGAAATTTTCC         | 13451          |
| GGGGAAAATTTTCCCGGGGAAAATTTTCC        | 13426          |
| GGGGAAATTTTCCCGGGGAAAATTTTCC         | 12803          |
| GGGGAAAATTTTCCCGGGGAAAATTTTCC        | 11949          |
| GGGGAAAATTTTACC                      | 11730          |
| TGGGAAAATTTTCCCGGGGAAAATTTTCC        | 8438           |
| GGTGAAAATTTTCCCGGGGAAAATTTTCC        | 8037           |
| GGGGAAAATTTTCCCGGGTAAAATTTTCC        | 7069           |
| GGGGATAATTTTCCCGGGGAAAATTTTCC        | 6921           |

|                                   |      |
|-----------------------------------|------|
| GGGGAAAATTTTCACCGGGGAAAATTTTCCCC  | 6831 |
| GGGGAAAATTTTCCCCGGGGAAAATTTTCAACC | 6576 |
| GGGGAAATTTTCCCCGGGGAAAATTTTCCCC   | 6558 |
| GGGGAAAATTTTCCCCGGGGAAAATTTTCCAC  | 6555 |

**Table S9: Original sequence and 25 most frequent mutations of FT2\_G2A2T2C2**

| Sequence                            | Sequence count |
|-------------------------------------|----------------|
| <b>GGAATTCGGAATTCGGAATTCGGAATTC</b> | <b>2040896</b> |
| GAATTCGGAATTCGGAATTCGGAATTC         | 6073           |
| GGAATTCGGAATTCGTAATTCGGAATTC        | 5990           |
| GGAATTCGGAATTACGGAATTCGGAATTC       | 5539           |
| GGAATTCGGAATTCGGAATTCGGAATTC        | 5123           |
| GGAATTCGGAATTCGGAATTCGTAATTC        | 5085           |
| GGAATTCGGAATTCGGAATTCGGAATTC        | 5080           |
| GGAATTCGGAATTCGGAATTCGGAATTCAC      | 4697           |
| GGAATTCGTAATTCGGAATTCGGAATTC        | 4674           |
| GGAATTCGGAATTCGGAATTCGGAATTC        | 4548           |
| GGAATTCGGAATTCGGAATTCGGAATTC        | 4547           |
| GTAATTCGGAATTCGGAATTCGGAATTC        | 4165           |
| GGAATTCGGAATTCGGAATTCGGAATTC        | 4057           |
| GGAATTCGGAATTCGAATTCGGAATTC         | 3949           |
| GGAATTCGGAATTCAGGAATTCGGAATTC       | 3664           |
| GGAATTCGGAATTCGGAATTCAGGAATTC       | 3571           |
| GGAATTCGGAATTCGGAATTCGGAATTCAC      | 3541           |
| TGAATTCGGAATTCGGAATTCGGAATTC        | 3522           |
| GGAATTCGGAATTCGTAATTCGGAATTC        | 3473           |
| GGAATTCGTAATTCGGAATTCGGAATTC        | 3450           |
| GGAATTCGGAATTCGGAATTCGGAATTC        | 3374           |
| GGAATTCGGAATTCGGAATTCGGAATTC        | 3215           |
| GGAATTCGGAATTCGGAATTCGGAATTC        | 3196           |
| GGAATTCGGAATTCGGAATTCGGAATTC        | 3180           |
| GGAATTCGGAATTCGGAATTCGGAATTC        | 3161           |
| GGAATTCGGAATTCGGAATTCGGAATTC        | 3152           |

**Table S10: Original sequence and 25 most frequent mutations of FT2\_G3A3T3C3**

| Sequence                              | Sequence count |
|---------------------------------------|----------------|
| <b>GGGAAATTTCCCGGAAATTTCCCGGAAATT</b> | <b>5535182</b> |
| GGAAATTTCCCGGAAATTTCCCGGAAATT         | 21093          |
| GGGAAATTTCCCGGAAATTCGCGGAAATT         | 19864          |
| GGGAAATTTCCCGGAAATTTCCCGGAAATT        | 19079          |
| GGGAAATTTCCCGGAAATTTCCCGGAAATT        | 18549          |
| GGGAAATTTCCCGGAAATTTACCGGAAATT        | 17688          |
| GGGAAATTTCCCGAAATTTCCCGGAAATT         | 16754          |
| GGGAAATTTCCAGGGAAATTTCCCGGAAATT       | 16257          |
| GGGAAATTTCCCGGAAATTTCCAGGGAAATT       | 16206          |
| GGGAAATTTCCCTGGAAATTTCCCGGAAATT       | 15353          |

|                                     |       |
|-------------------------------------|-------|
| GGGAAATTTCCCGGGAAATTTCCGGGAAATT     | 14511 |
| GGTAAATTTCCCGGGAAATTTCCCGGGAAATT    | 13353 |
| GGGAAATTTCCCGGGAAATTTCCCGGAAATT     | 12584 |
| TGGAAATTTCCCGGGAAATTTCCCGGGAAATT    | 12115 |
| GGGAAATTTCCCGGTAAATTTCCCGGGAAATT    | 12041 |
| GGGAAATTTCCCGGGAAATTTCCCTGGAAATT    | 11707 |
| GGGAAATTCCTCCGGGAAATTTCCCGGGAAATT   | 11475 |
| GGGAAATTTCCCGTGAAATTTCCCGGGAAATT    | 11190 |
| GGGAAATTTCCCGGGAAATTTCCCGGGAATT     | 10863 |
| GGGAAATTTCACTCCGGGAAATTTCCCGGGAAATT | 10839 |
| GGGAAATTTCCCGGGAAATTTCACTCCGGGAAATT | 10796 |
| GGGAAATTTCCCGGGAAATTTCCCGTGAAATT    | 10637 |
| GGGAATTTCCCGGGAAATTTCCCGGGAAATT     | 10332 |
| GTGAAATTTCCCGGGAAATTTCCCGGGAAATT    | 10015 |
| GGGAAATTTACTCCGGGAAATTTCCCGGGAAATT  | 9290  |
| GGGAAATTTCCCGGGAAATTTCCCGGTAAATT    | 8848  |

**Table S11: Original sequence and 25 most frequent mutations of FT2\_TGCA**

| Sequence                            | Sequence count |
|-------------------------------------|----------------|
| <b>TGCATGCATGCATGCATGCATGCATGCA</b> | <b>6627344</b> |
| TGCATGCATGCATGCATGCTTGCATGCATGCA    | 45693          |
| TGCATGCATGCTTGCATGCATGCATGCATGCA    | 36139          |
| TGCAAGCATGCATGCATGCATGCATGCATGCA    | 26613          |
| TGCATGCATGCATGCATGCATGCATGCA        | 24728          |
| TGCATGCATGCATGCATGCATGCATGCATGAA    | 19114          |
| TGCATGCATGAAATGCATGCATGCATGCATGCA   | 18958          |
| TGTATGCATGCATGCATGCATGCATGCATGCA    | 12451          |
| TGCATGCATTCATGCATGCATGCATGCATGCA    | 11260          |
| TGCATGTATGCATGCATGCATGCATGCATGCA    | 10812          |
| TGCATGCATGCATGTATGCATGCATGCATGCA    | 10365          |
| TGCATGCATGTATGCATGCATGCATGCATGCA    | 10306          |
| TGCATGCATGCATGAATGCATGCATGCATGCA    | 9163           |
| TGCATGCATGCATGCATGTATGCATGCATGCA    | 8532           |
| TGCATGCATGCATGCATGCATGTATGCA        | 7920           |
| TGCATGCATGCATGCATGCATGTATGCATGCA    | 7487           |
| TGCATGCATGCTGCATGCATGCATGCATGCA     | 7444           |
| TGCATGCATGCATGCATGCATGCATGCATAA     | 7208           |
| TGCATGCATCATGCATGCATGCATGCATGCA     | 7143           |
| TGCATGCATGCATGCATGAAATGCATGCATGCA   | 7044           |
| TGCATGCATGCATGCATGCATGCATGAAATGCA   | 6912           |
| TGCATGAAATGCATGCATGCATGCATGCATGCA   | 6769           |
| TGAAATGCATGCATGCATGCATGCATGCATGCA   | 6711           |
| TGCATGCATGCATGCATGCATGATGCATGCA     | 6706           |
| TGCATGCATGCATCATGCATGCATGCATGCA     | 6549           |
| TGCATGCATGCATGCATGCATGCATGACATGCA   | 6531           |

**Table S12: Original sequence and 25 most frequent mutations of D3\_TGCA**

| Sequence                                           | Sequence count |
|----------------------------------------------------|----------------|
| <b>TGCATGCATGCATGCATGCATGCATGCATGCA</b>            | <b>398611</b>  |
| TGCATGCATGCATGCATGCATGC <b>T</b> TGCATGCATGCA      | 1654           |
| TGCATGCATGCATGCATGC <b>T</b> TGCATGCATGCATGCA      | 1560           |
| TGCATG <b>T</b> ATGCATGCATGCATGCATGCATGCA          | 1190           |
| TGCATGCATGCATGCATGCATGCATGCATGC <b>A</b>           | 1026           |
| TGCATGCATGCATGCATGCATGCATG <b>T</b> ATGCATGCA      | 588            |
| TGCATGC <b>T</b> TGCATGCATGCATGCATGCATGCATGCA      | 555            |
| TGCATGCATGCATGCATGC <b>T</b> ATGCATGCATGCA         | 545            |
| TGCATGCATGCATGCATGCATGCATGCATGCATGC <b>A</b> CA    | 530            |
| TG <b>T</b> ATGCATGCATGCATGCATGCATGCATGCATGCA      | 518            |
| TGCATGCATGCATGCATGCATGCATGCATGCATGC <b>A</b> ATGCA | 498            |
| TGCATGCATG <b>T</b> ATGCATGCATGCATGCATGCA          | 459            |
| TGCATGCAT <b>T</b> CATGCATGCATGCATGCATGCA          | 455            |
| TG <b>A</b> ATGCATGCATGCATGCATGCATGCATGCA          | 418            |
| TGCATGCATGCATGCATGC <b>A</b> CATGCATGCATGCA        | 395            |
| TGCATGCATGCATGCATGC <b>A</b> CATGCATGCATGCA        | 393            |
| TGCATGCATGCATGCATG <b>T</b> ATGCATGCATGCATGCA      | 392            |
| TGCATGCATGCATGCATGCATGC <b>A</b> CATGCATGCA        | 390            |
| TGCATG <b>A</b> ATGCATGCATGCATGCATGCATGCA          | 379            |
| TGCATG <b>C</b> TGCATGCATGCATGCATGCATGCA           | 368            |
| TGCATGCATGCATGC <b>A</b> ATGCATGCATGCATGCA         | 364            |
| TGCATGCATGCATGCATGC <b>T</b> CATGCATGCATGCA        | 345            |
| TGCATGCATGCATGCATGCATGCATGCATGCATGC <b>A</b> A     | 344            |
| TGCATGC <b>A</b> CATGCATGCATGCATGCATGCATGCA        | 335            |
| TGCATGCATGCATGCATGC <b>A</b> ATGCATGCATGCA         | 332            |
| TGCATGCATGCATGCATGCATGCATGCATGC <b>A</b> ATGCA     | 306            |

**Table S13: Original sequence and 25 most frequent mutations of FT2\_T4G4C4A4**

| Sequence                                   | Sequence count |
|--------------------------------------------|----------------|
| <b>TTTTGGGGCCCCAAAATTTTGGGGCCCCAAAA</b>    | <b>1745068</b> |
| TTTTGGGGCCCC <b>A</b> AAAATTTTGGGGCCCCAAAA | 9556           |
| TTTTGGGGCCCCAAAAT <b>T</b> GGGGCCCCAAAA    | 7973           |
| TTTTGGGGCCCCAAA <b>T</b> TTTGGGGCCCCAAAA   | 7625           |
| TTTTGGGGCCCCAAAATTTTGG <b>C</b> CCCCAAAA   | 7388           |
| TTTTGGGGCC <b>CA</b> AAAATTTTGGGGCCCCAAAA  | 6884           |
| TTTTGG <b>GC</b> CCCCAAAATTTTGGGGCCCCAAAA  | 4855           |
| TTTTGGGGCCCCAAAATTTTGGGGCC <b>CA</b> AAAA  | 4841           |
| TTTTGGGGC <b>T</b> CCAAAATTTTGGGGCCCCAAAA  | 4576           |
| TTTTGGGGCC <b>T</b> CAAAAATTTTGGGGCCCCAAAA | 4488           |
| TTTTGGGGCCCCAAAATTTTGGGGCCCCAA <b>A</b>    | 4334           |
| TT <b>TG</b> GGGGCCCCAAAATTTTGGGGCCCCAAAA  | 4234           |
| TTTTGGGGCCCCAAAATTTT <b>T</b> GGGGCCCCAAAA | 4229           |
| TTTTGGGGCC <b>T</b> AAAATTTTGGGGCCCCAAAA   | 4204           |
| TTTTGGGGCCCCAAAATTTTGGGGC <b>T</b> CCAAAA  | 3987           |
| TTTTGGGG <b>T</b> CCAAAATTTTGGGGCCCCAAAA   | 3946           |
| TTTTGGGGCCCCAAAATTTT <b>A</b> GGGGCCCCAAAA | 3878           |
| TTTTGGGGCCCCAAAATTTTGG <b>A</b> GCCCCAAAA  | 3860           |



|                                   |      |
|-----------------------------------|------|
| TTTTGGGGCCCCAAAATTTTGAAGGCCCAAAA  | 3606 |
| TTTTGGGGCCCCAAAATTTTGGGAACCCCAAAA | 3308 |
| TTTTGGGGCCCCAAAATTTGTGGGCCCAAAA   | 2968 |
| TTTTGGGGCCAACAAAATTTTGGGGCCCCAAA  | 2940 |
| TTTTGTGGGCCCAAAAATTTTGGGGCCCCAAA  | 2649 |
| TTTTGGGGCCCCAAAATTTTGGGGCCCCAAA   | 2524 |
| TTTTGGGGCCCCAAAATTTTGGGGCCCCAAA   | 2469 |
| TTTTGGGGCCCCAAAATTTTGGGGCCAACAAA  | 2430 |

**Table S14: Original sequence and 25 most frequent mutations of D3\_T4G4C4A4**

| Sequence                               | Sequence count |
|----------------------------------------|----------------|
| <b>TTTTGGGGCCCCAAAATTTTGGGGCCCCAAA</b> | <b>5284258</b> |
| TTTTGGGGCCCCAAAATAATTGGGGCCCCAAA       | 56226          |
| TTTTGGGGCCCCAAATTTTGGGGCCCCAAA         | 33501          |
| TTTTGGGGCCCCAAAATTTGGGGCCCCAAA         | 31991          |
| TTTTGGGGCCCAAAAATTTTGGGGCCCCAAA        | 19746          |
| TTTTGGGGCCCCAAAATTTTGGGCCCAAAA         | 18308          |
| TTTTGGGGCCCCAAAATTTTGGGGCCCAAAA        | 18108          |
| TTTTGGGGCCCAAAAATTTTGGGGCCCCAAA        | 16172          |
| TTTTGGGGCCCCAAAATTTTGGGGCCCCAAA        | 16010          |
| TTTTGGGCCCAAAAATTTTGGGGCCCCAAA         | 15538          |
| TTTTGGGGCCCTAAAATTTTGGGGCCCCAAA        | 14219          |
| TTTTGGGGCTCCAAAATTTTGGGGCCCCAAA        | 14016          |
| TTTTGGGGCCCTCAAAAATTTTGGGGCCCCAAA      | 13073          |
| TTTTGGGGCCCCAAAATTTTGGGGCCCCAA         | 12625          |
| TTTTGGGGTCCCAAAAATTTTGGGGCCCCAAA       | 10980          |
| TTTGGGGCCCCAAAATTTTGGGGCCCCAAA         | 10697          |
| TTTTGGGGCCAACAAAATTTTGGGGCCCCAAA       | 9072           |
| TTTTGGGGCCCCAAAATTTTGTGGGCCCAAAA       | 8441           |
| TTTTGTGGGCCCAAAAATTTTGGGGCCCCAAA       | 8378           |
| TTTTGGGGCCCCAAAATTTTGAAGGCCCAAAA       | 7925           |
| TTTTGGGGCCCCAAAATTTTGGGGCCAACAAA       | 7891           |
| TTTTTGGGCCCAAAAATTTTGGGGCCCCAAA        | 7708           |
| TTTTGGGGCCCCAAAATTTTGGGAACCCCAAAA      | 7669           |
| TTTTGTGGGCCCAAAAATTTTGGGGCCCCAAA       | 7171           |
| TTTTGGGGCCCCAAAATTTTGAAGGGCCCCAAA      | 7018           |
| TTTTGGGGCCCCAAAATTTTGAAGGCCCAAAA       | 6677           |

Figure S1

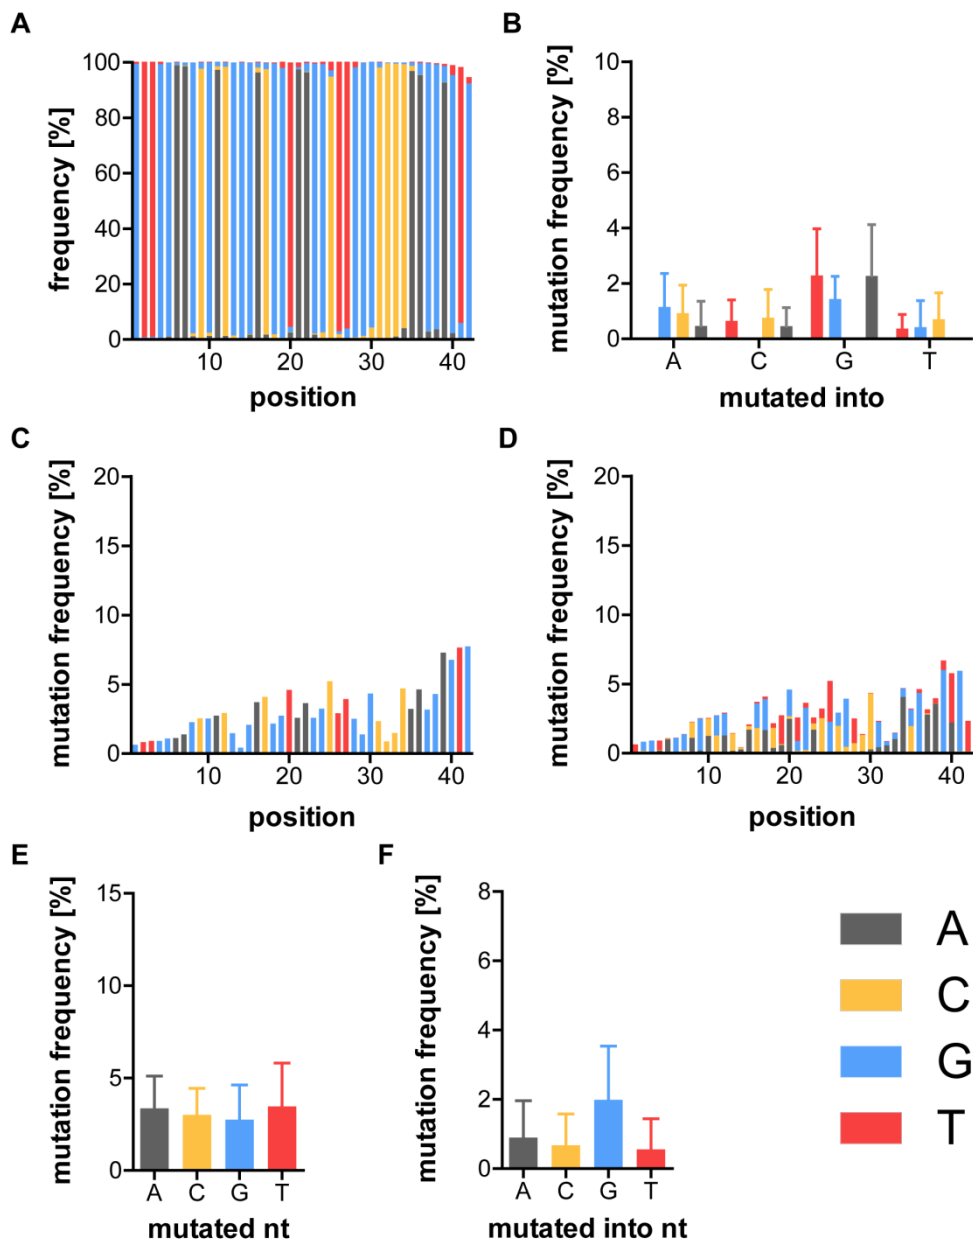

Figure S1: Mutation analysis of C12\_T\_PWO

(A) Frequency of the different nucleotides at all positions of the random region. (B) Frequencies with which one nucleotide (denoted by colour) mutates into another nucleotide (denoted on the x-axis). Depicted is the mean and SD. Mutation frequency at all positions of the random region of (C) the original nucleotide and (D) the nucleotide that has been mutated into. Mutation frequencies of the original nucleotides (E) and the nucleotides that has been mutated into (F). Depicted is the mean and SD.

Figure S2

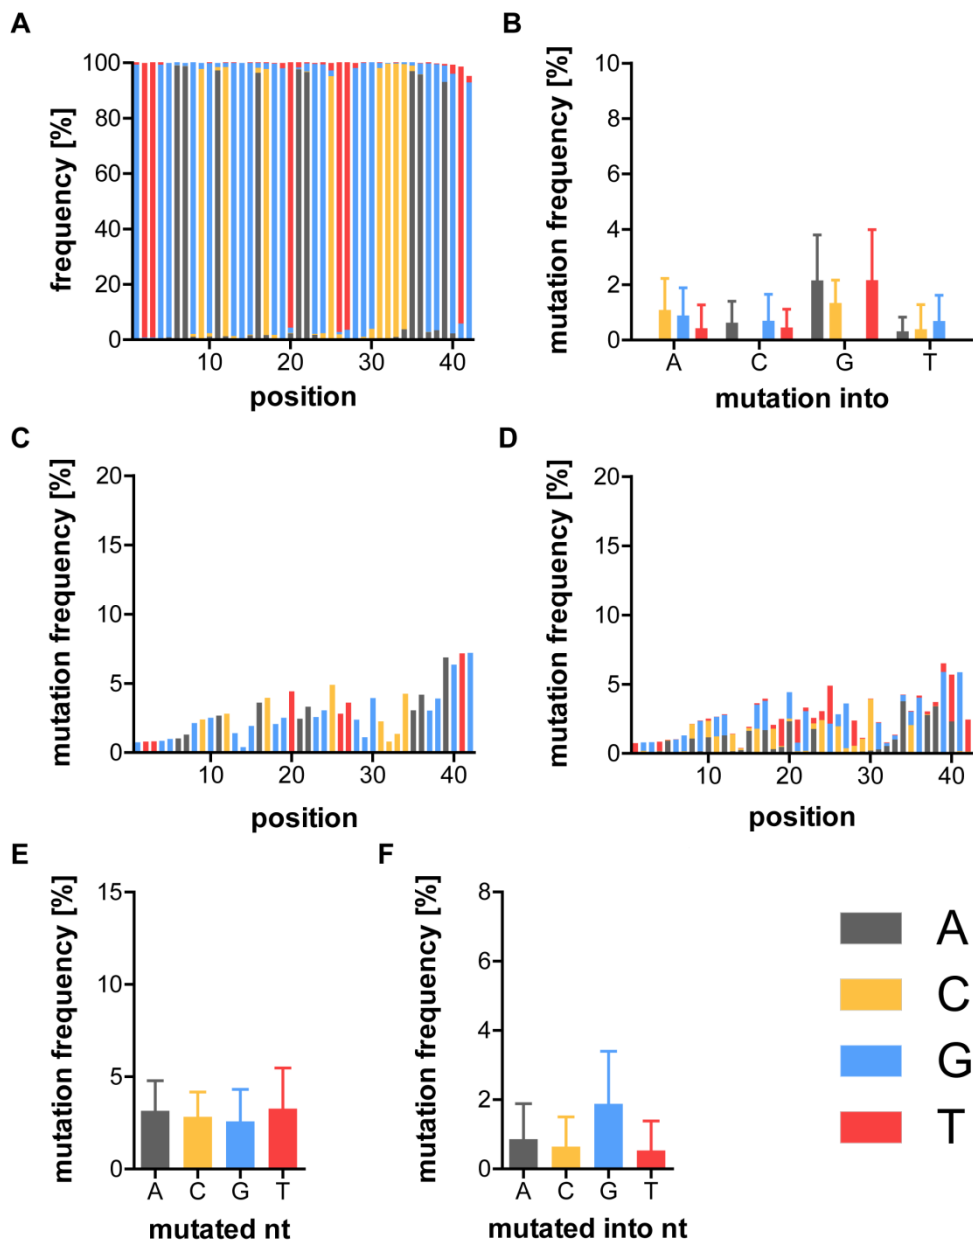

Figure S2: Mutation analysis of C12\_T\_Taq

(A) Frequency of the different nucleotides at all positions of the random region. (B) Frequencies with which one nucleotide (denoted by colour) mutates into another nucleotide (denoted on the x-axis). Depicted is the mean and SD. Mutation frequency at all positions of the random region of (C) the original nucleotide and (D) the nucleotide that has been mutated into. Mutation frequencies of the original nucleotides (E) and the nucleotides that has been mutated into (F). Depicted is the mean and SD.

Figure S3

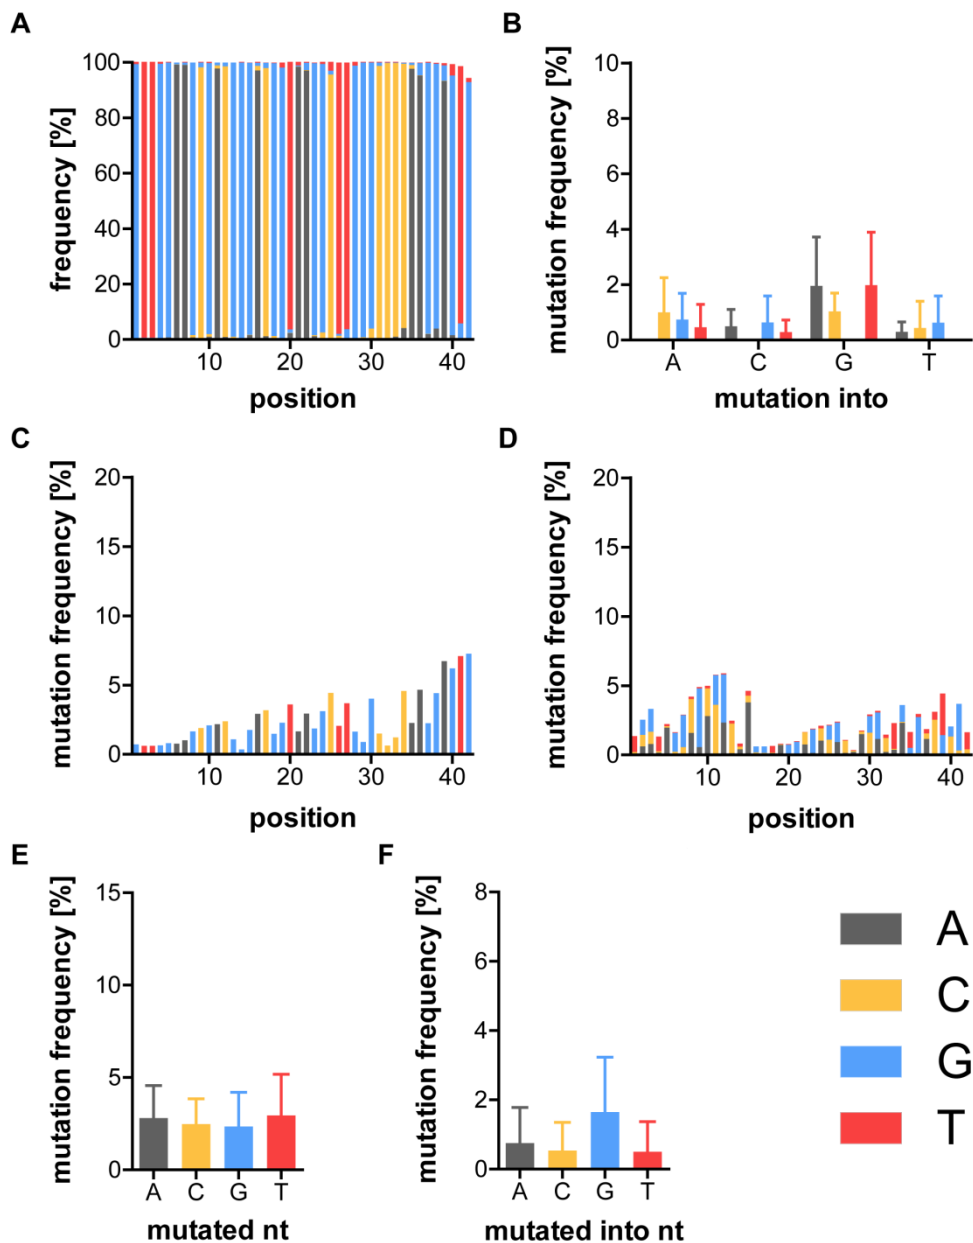

Figure S3: Mutation analysis of C12\_T\_w/o

(A) Frequency of the different nucleotides at all positions of the random region. (B) Frequencies with which one nucleotide (denoted by colour) mutates into another nucleotide (denoted on the x-axis). Depicted is the mean and SD. Mutation frequency at all positions of the random region of (C) the original nucleotide and (D) the nucleotide that has been mutated into. Mutation frequencies of the original nucleotides (E) and the nucleotides that has been mutated into (F). Depicted is the mean and SD.

Figure S4

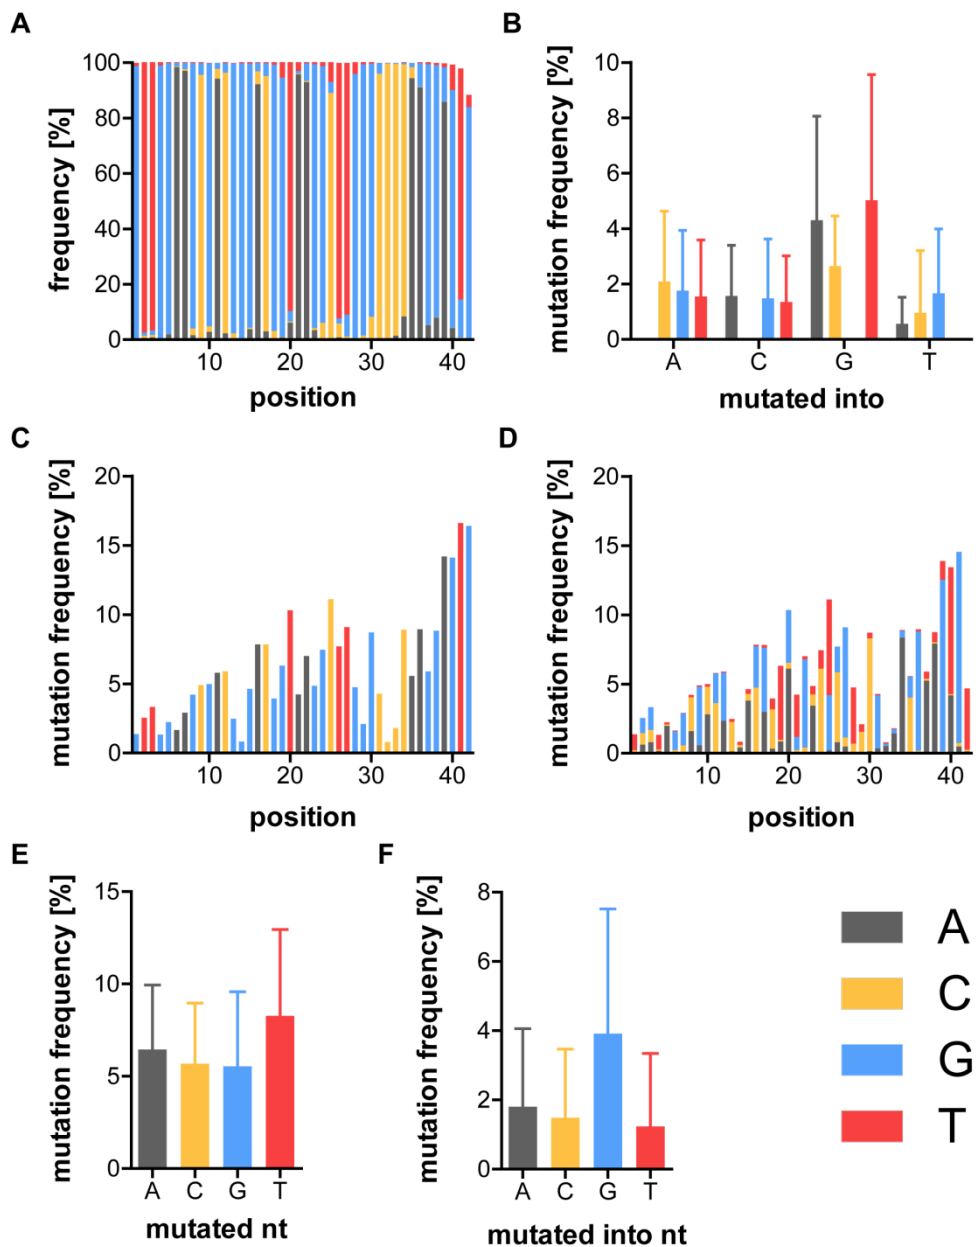

Figure S4: Mutation analysis of C12\_EdU

(A) Frequency of the different nucleotides at all positions of the random region. (B) Frequencies with which one nucleotide (denoted by colour) mutates into another nucleotide (denoted on the x-axis). Depicted is the mean and SD. Mutation frequency at all positions of the random region of (C) the original nucleotide and (D) the nucleotide that has been mutated into. Mutation frequencies of the original nucleotides (E) and the nucleotides that has been mutated into (F). Depicted is the mean and SD.

Figure S5

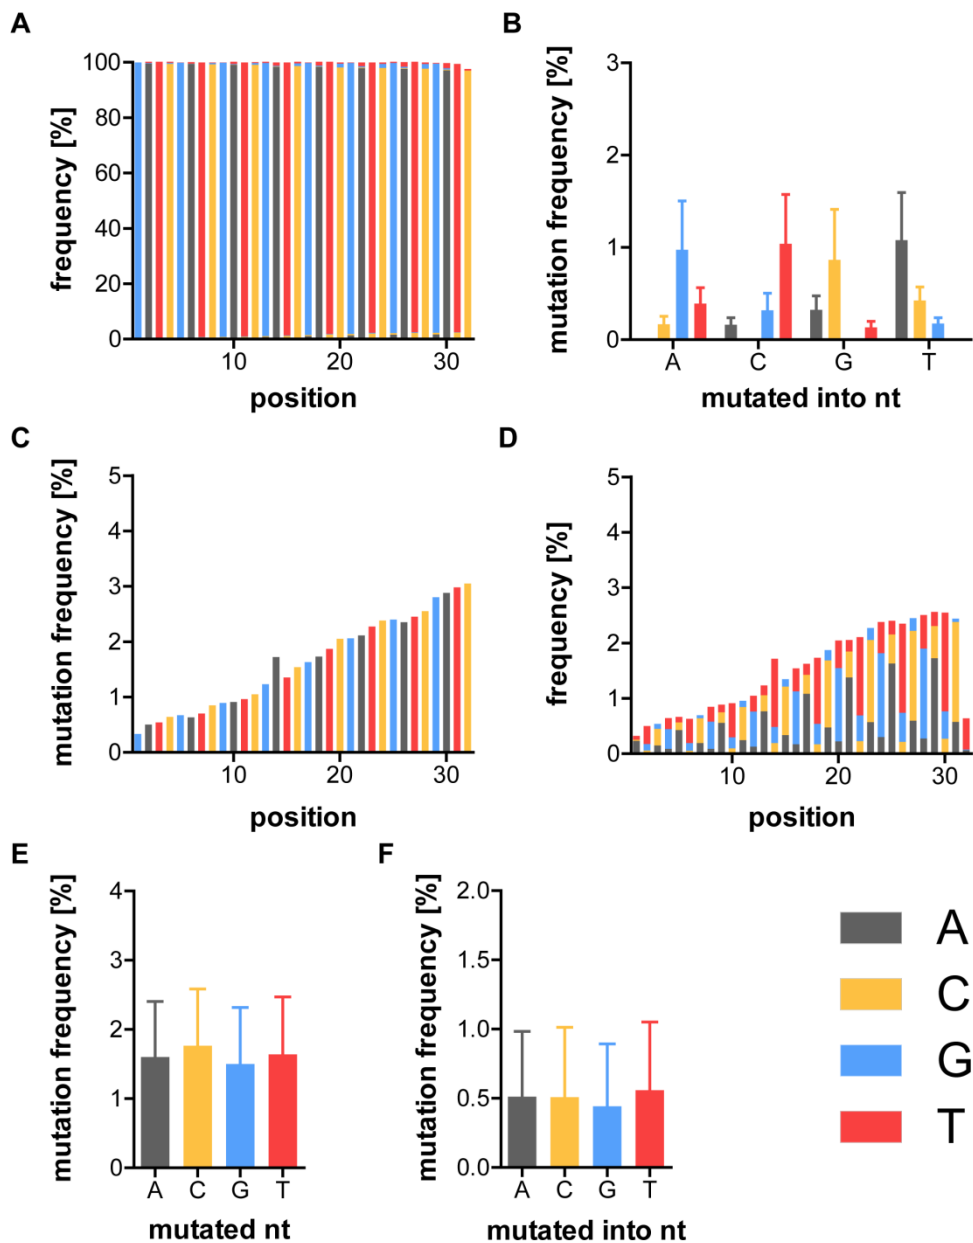

Figure S5: Mutation analysis of FT2\_GATC

(A) Frequency of the different nucleotides at all positions of the random region. (B) Frequencies with which one nucleotide (denoted by colour) mutates into another nucleotide (denoted on the x-axis). Depicted is the mean and SD. Mutation frequency at all positions of the random region of (C) the original nucleotide and (D) the nucleotide that has been mutated into. Mutation frequencies of the original nucleotides (E) and the nucleotides that has been mutated into (F). Depicted is the mean and SD.

Figure S6

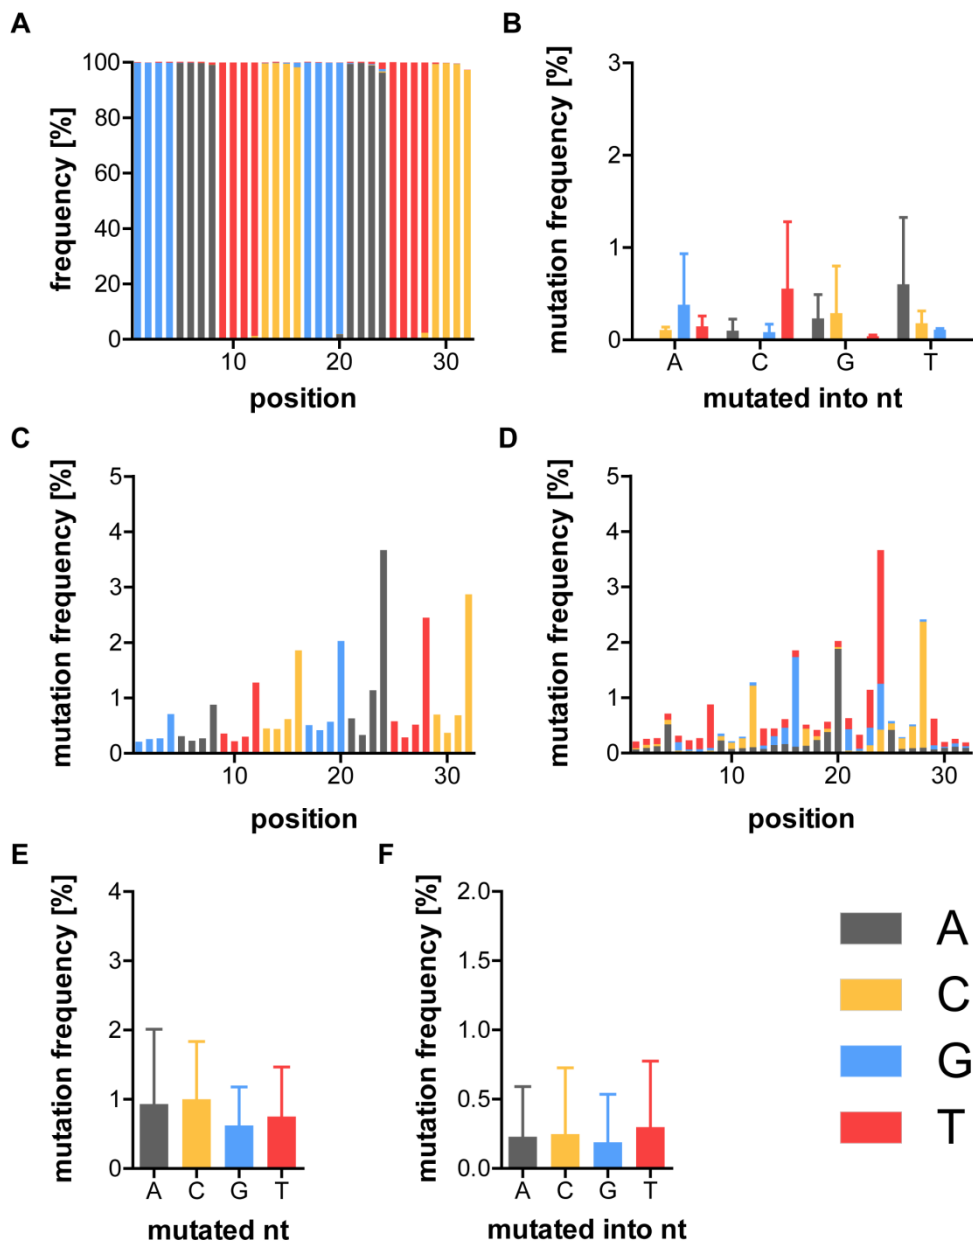

Figure S6: Mutation analysis of FT2\_G4A4T4C4

(A) Frequency of the different nucleotides at all positions of the random region. (B) Frequencies with which one nucleotide (denoted by colour) mutates into another nucleotide (denoted on the x-axis). Depicted is the mean and SD. Mutation frequency at all positions of the random region of (C) the original nucleotide and (D) the nucleotide that has been mutated into. Mutation frequencies of the original nucleotides (E) and the nucleotides that has been mutated into (F). Depicted is the mean and SD.

Figure S7

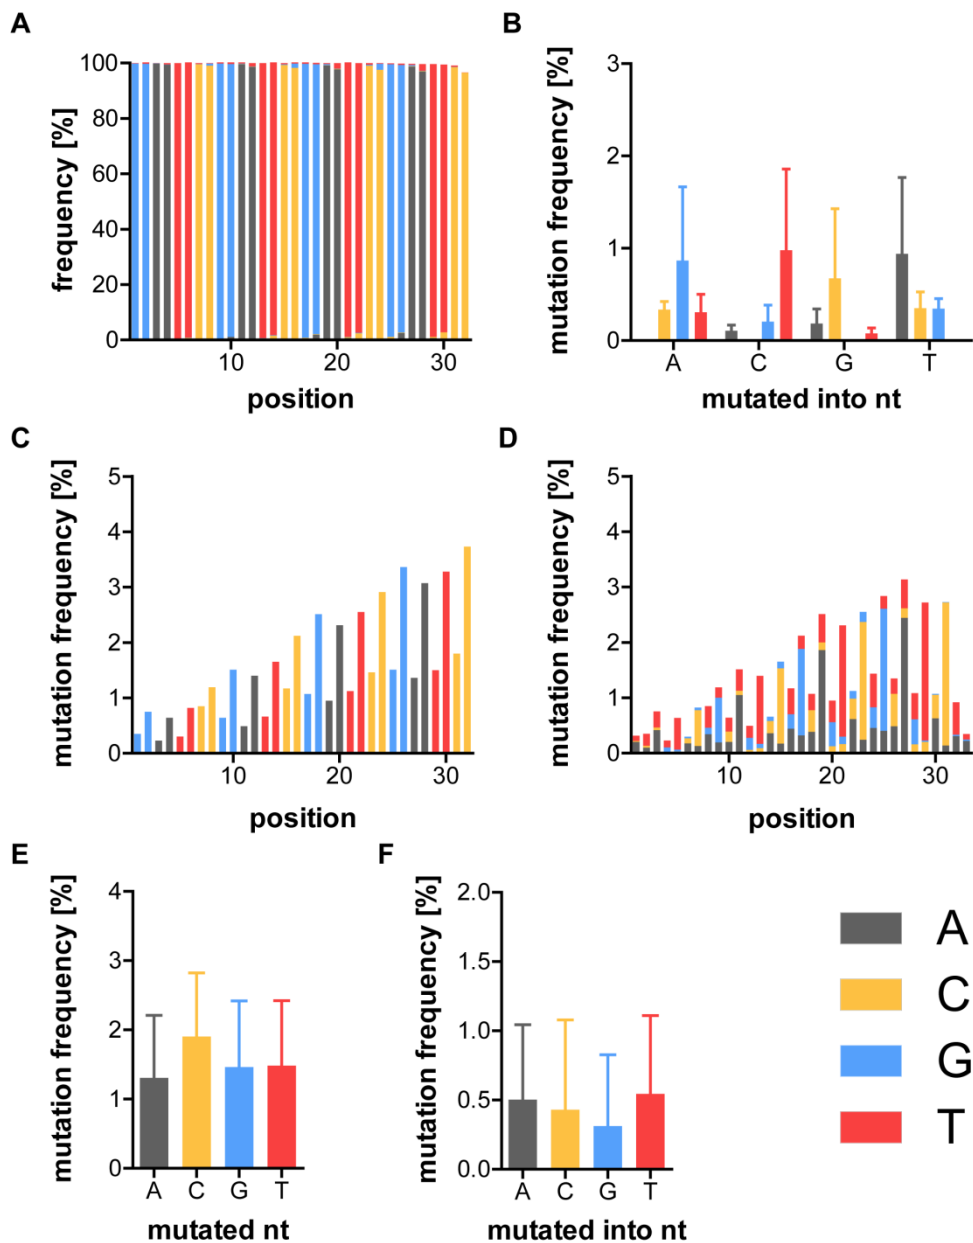

Figure S7: Mutation analysis of FT2\_G2A2T2C2

(A) Frequency of the different nucleotides at all positions of the random region. (B) Frequencies with which one nucleotide (denoted by colour) mutates into another nucleotide (denoted on the x-axis). Depicted is the mean and SD. Mutation frequency at all positions of the random region of (C) the original nucleotide and (D) the nucleotide that has been mutated into. Mutation frequencies of the original nucleotides (E) and the nucleotides that has been mutated into (F). Depicted is the mean and SD.



Figure S8

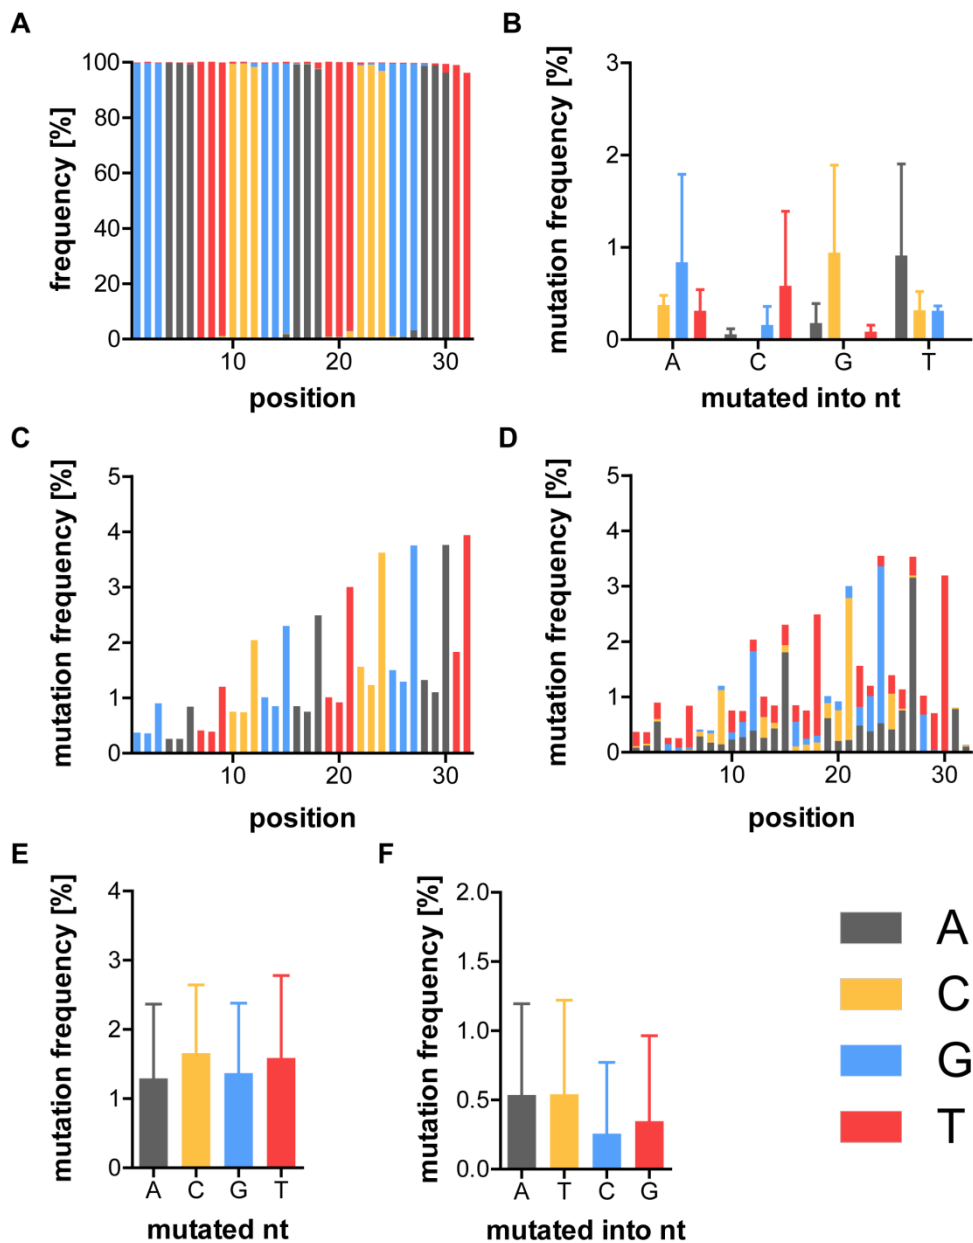

Figure S8: Mutation analysis of FT2\_G3A3T3C3

(A) Frequency of the different nucleotides at all positions of the random region. (B) Frequencies with which one nucleotide (denoted by colour) mutates into another nucleotide (denoted on the x-axis). Depicted is the mean and SD. Mutation frequency at all positions of the random region of (C) the original nucleotide and (D) the nucleotide that has been mutated into. Mutation frequencies of the original nucleotides (E) and the nucleotides that has been mutated into (F). Depicted is the mean and SD.

Figure S9

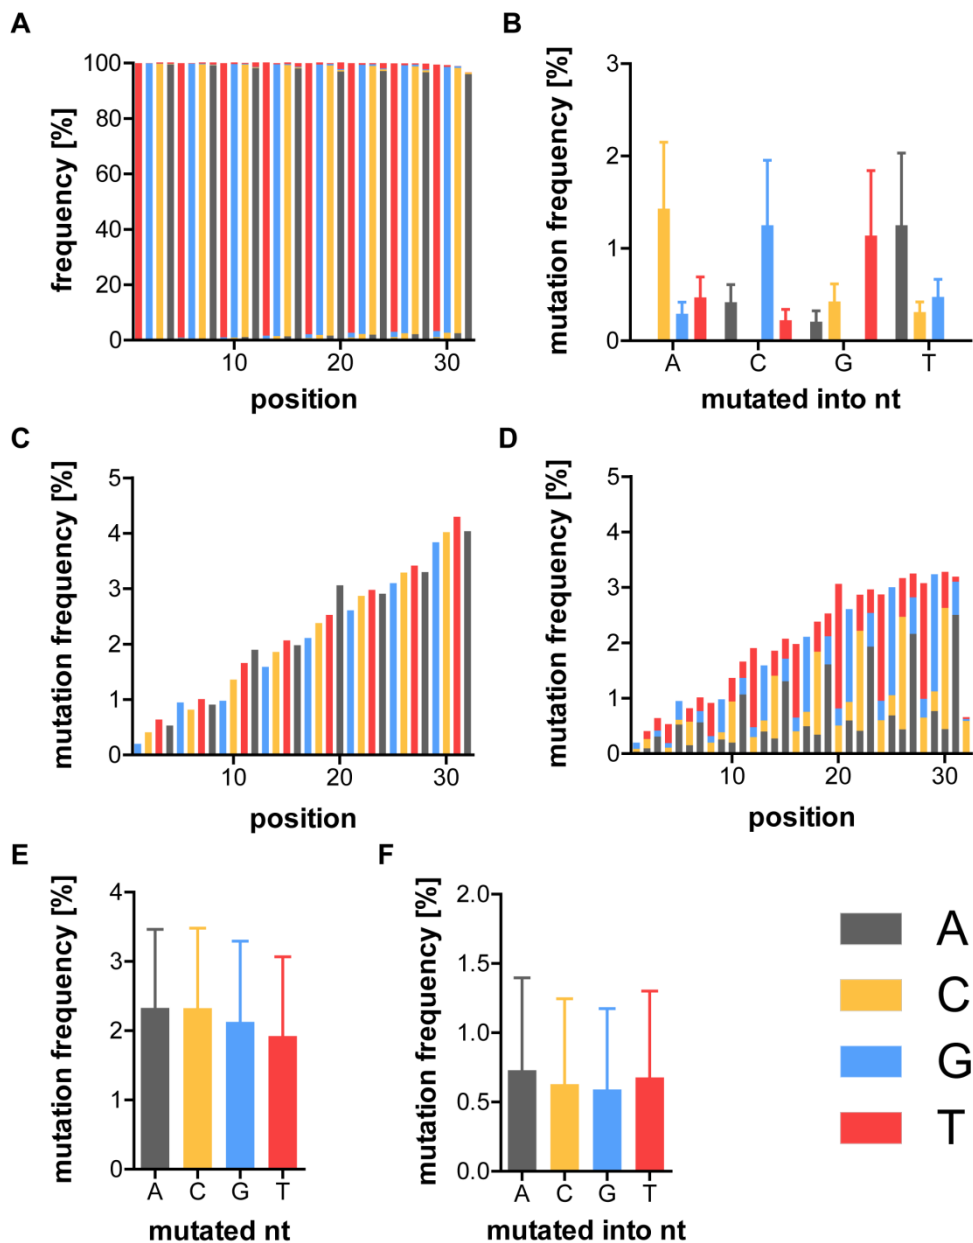

Figure S9: Mutation analysis of FT2\_TGCA

(A) Frequency of the different nucleotides at all positions of the random region. (B) Frequencies with which one nucleotide (denoted by colour) mutates into another nucleotide (denoted on the x-axis). Depicted is the mean and SD. Mutation frequency at all positions of the random region of (C) the original nucleotide and (D) the nucleotide that has been mutated into. Mutation frequencies of the original nucleotides (E) and the nucleotides that has been mutated into (F). Depicted is the mean and SD.

Figure S10

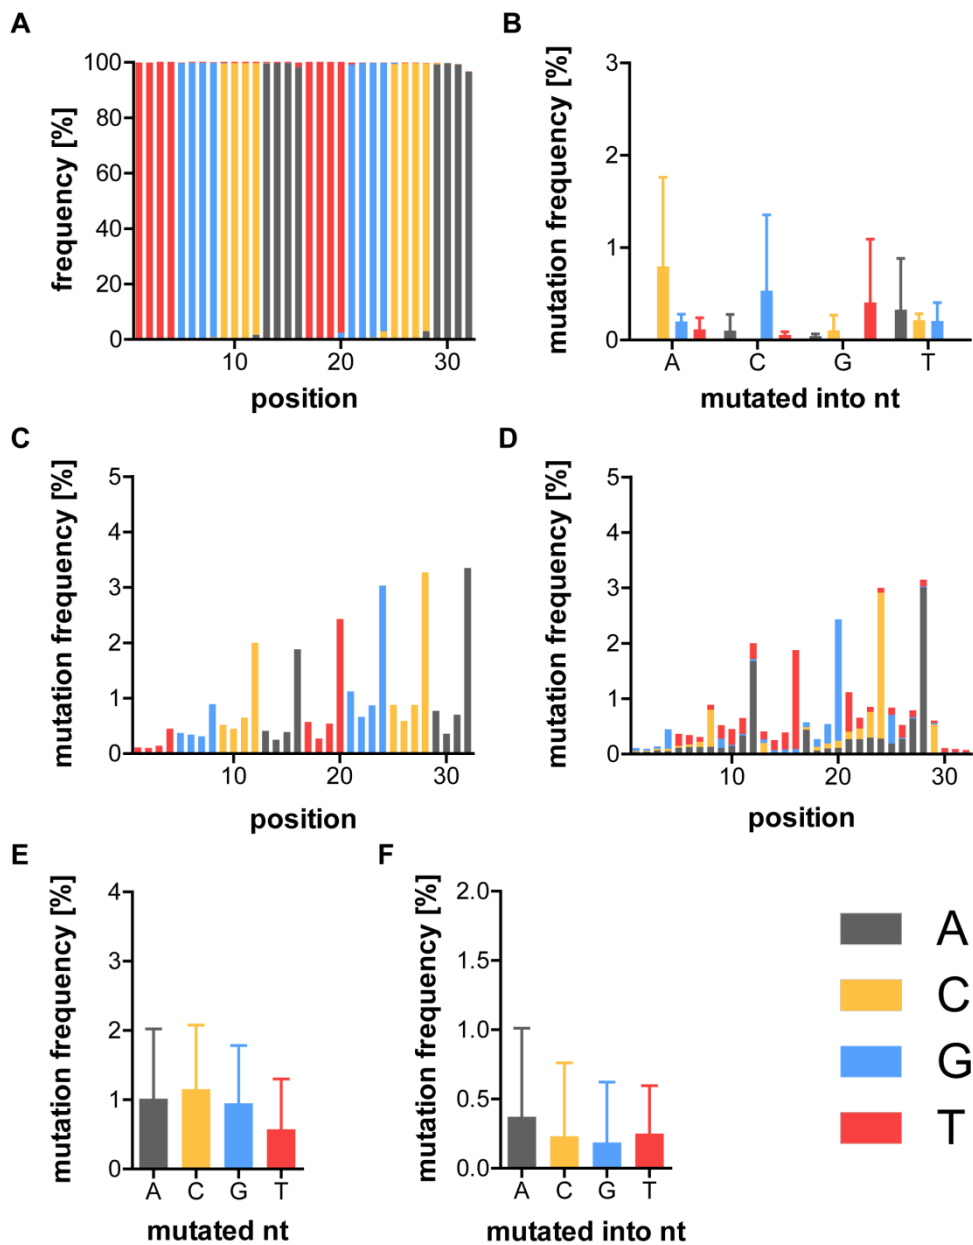

Figure S10: Mutation analysis of FT2\_T4G4C4A4

(A) Frequency of the different nucleotides at all positions of the random region. (B) Frequencies with which one nucleotide (denoted by colour) mutates into another nucleotide (denoted on the x-axis). Depicted is the mean and SD. Mutation frequency at all positions of the random region of (C) the original nucleotide and (D) the nucleotide that has been mutated into. Mutation frequencies of the original nucleotides (E) and the nucleotides that has been mutated into (F). Depicted is the mean and SD.

Figure S11

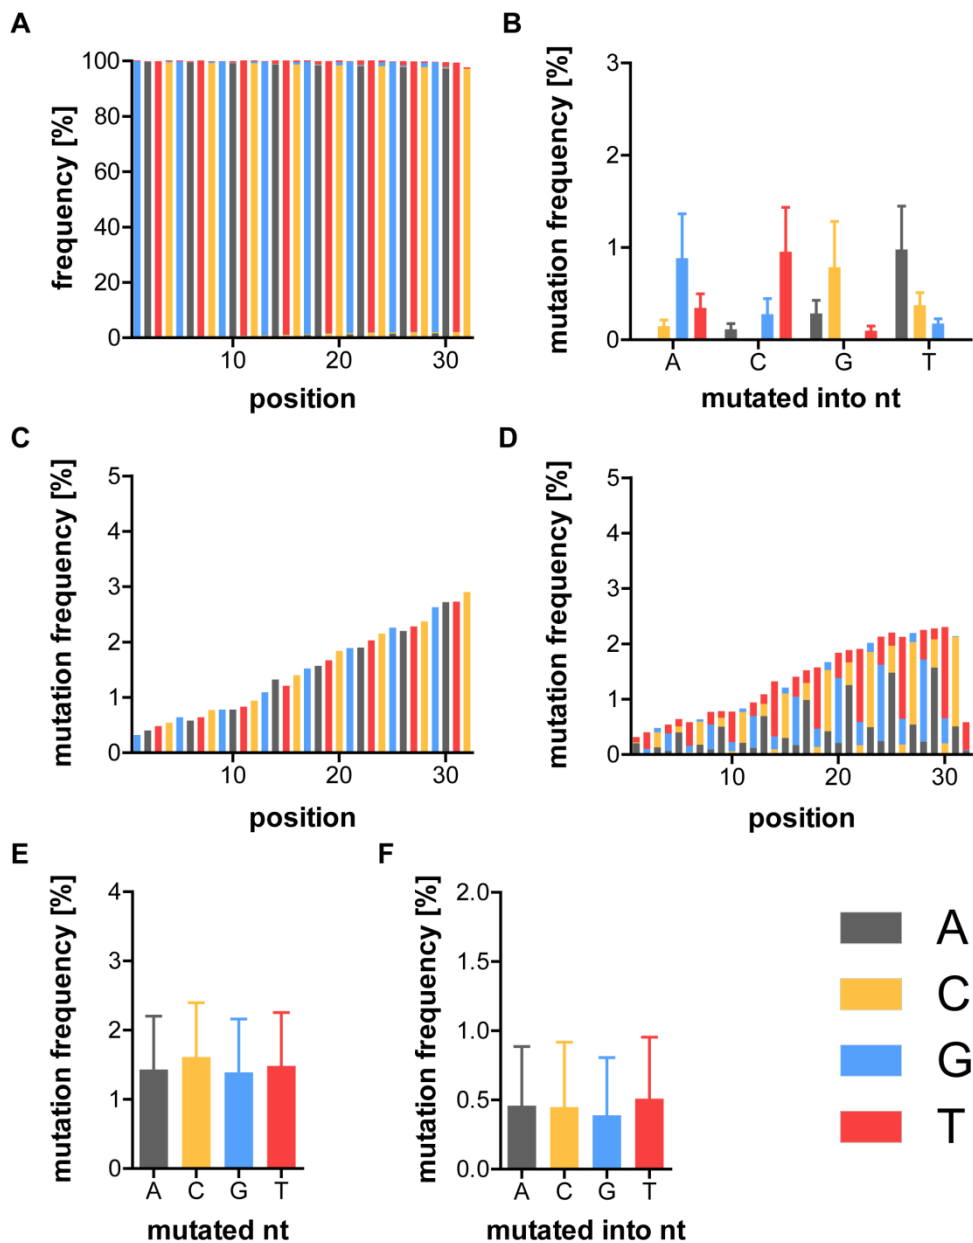

Figure S11: Mutation analysis of FT2\_GATC\_II

(A) Frequency of the different nucleotides at all positions of the random region. (B) Frequencies with which one nucleotide (denoted by colour) mutates into another nucleotide (denoted on the x-axis). Depicted is the mean and SD. Mutation frequency at all positions of the random region of (C) the original nucleotide and (D) the nucleotide that has been mutated into. Mutation frequencies of the original nucleotides (E) and the nucleotides that has been mutated into (F). Depicted is the mean and SD.

Figure S12

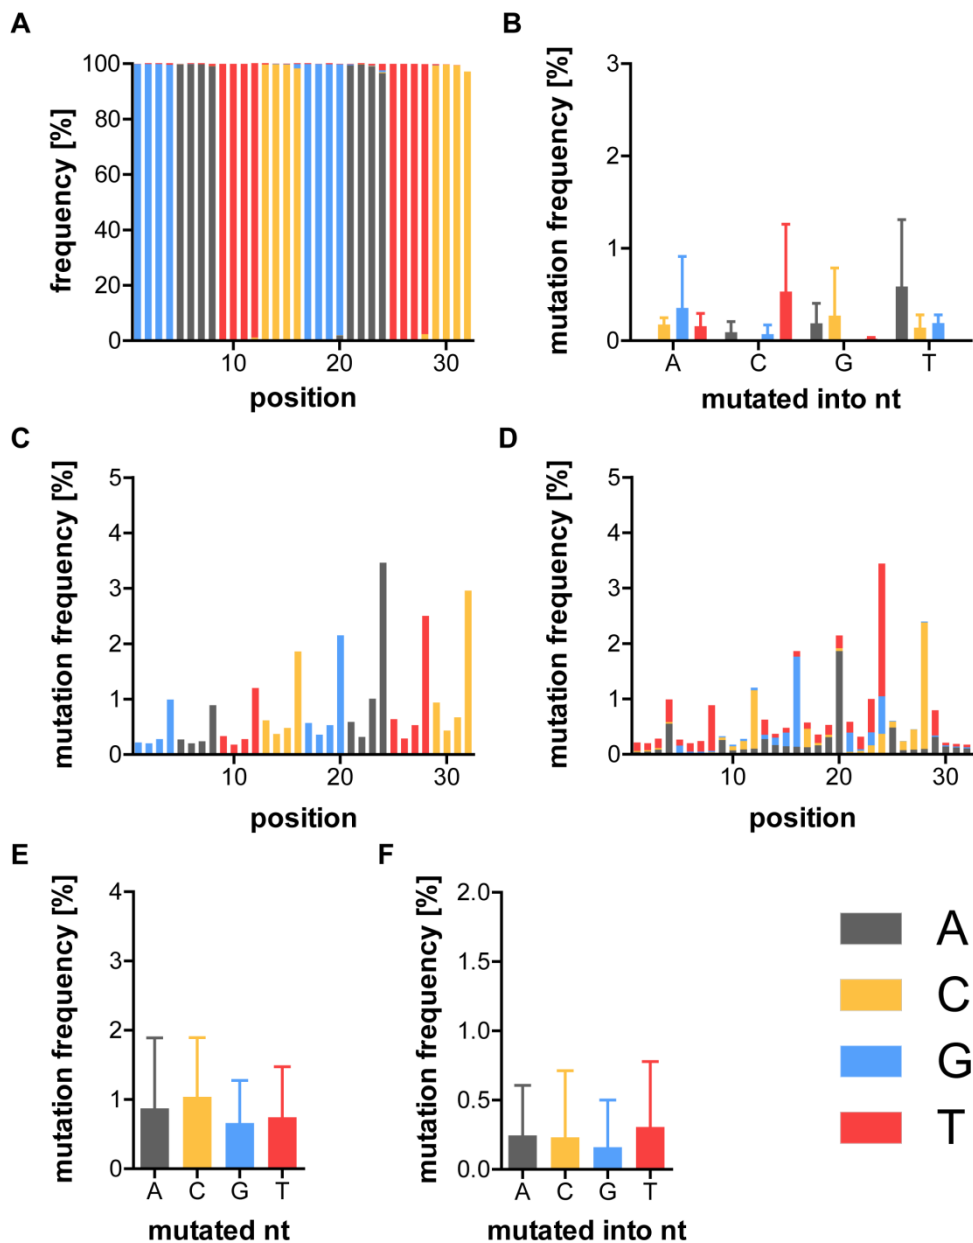

Figure S12: Mutation analysis of FT2\_G4A4T4C4\_II

(A) Frequency of the different nucleotides at all positions of the random region. (B) Frequencies with which one nucleotide (denoted by colour) mutates into another nucleotide (denoted on the x-axis). Depicted is the mean and SD. Mutation frequency at all positions of the random region of (C) the original nucleotide and (D) the nucleotide that has been mutated into. Mutation frequencies of the original nucleotides (E) and the nucleotides that has been mutated into (F). Depicted is the mean and SD.

Figure S13

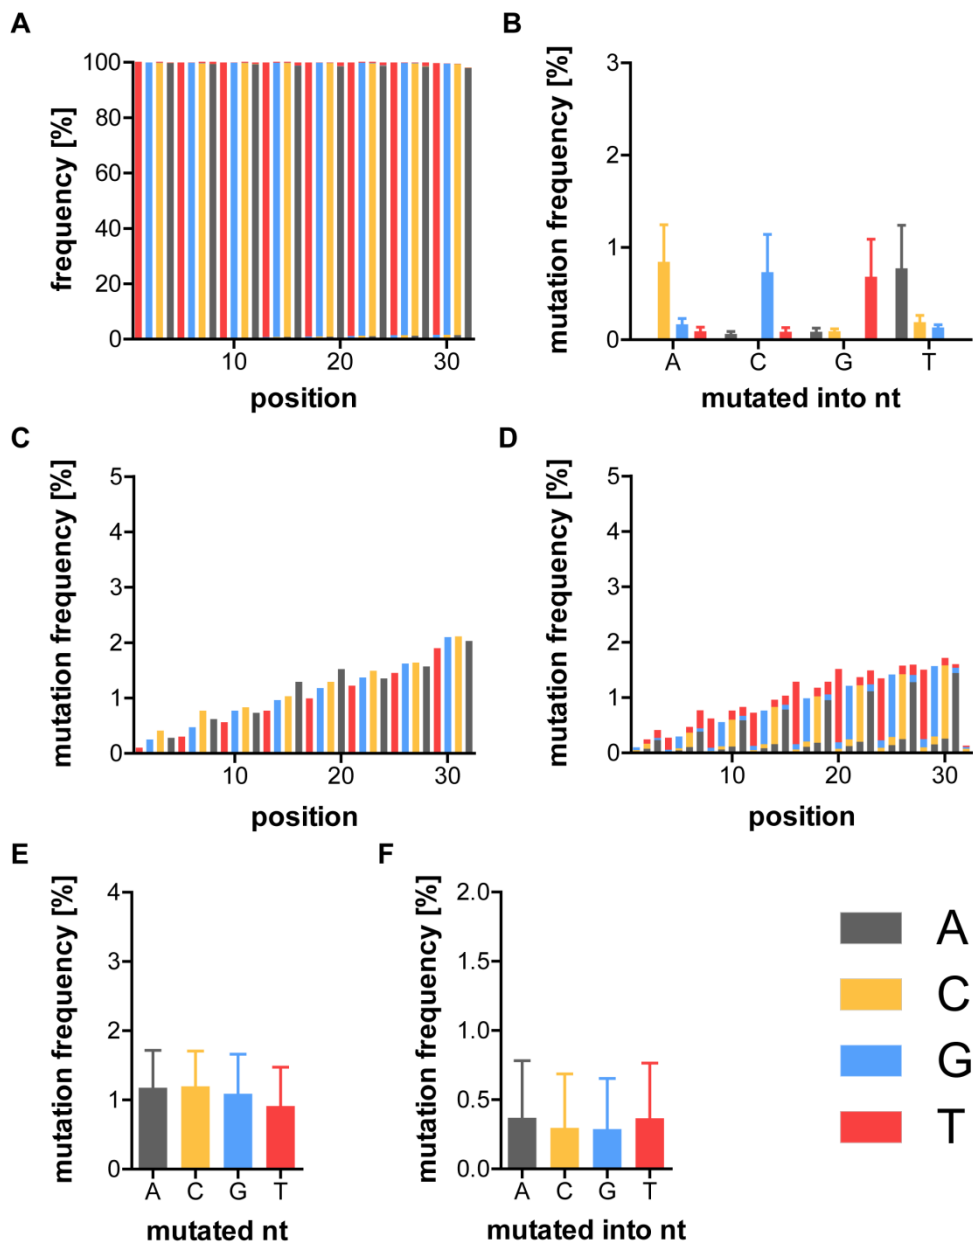

Figure S13: Mutation analysis of D3\_TGCA

(A) Frequency of the different nucleotides at all positions of the random region. (B) Frequencies with which one nucleotide (denoted by colour) mutates into another nucleotide (denoted on the x-axis). Depicted is the mean and SD. Mutation frequency at all positions of the random region of (C) the original nucleotide and (D) the nucleotide that has been mutated into. Mutation frequencies of the original nucleotides (E) and the nucleotides that has been mutated into (F). Depicted is the mean and SD.

Figure S14

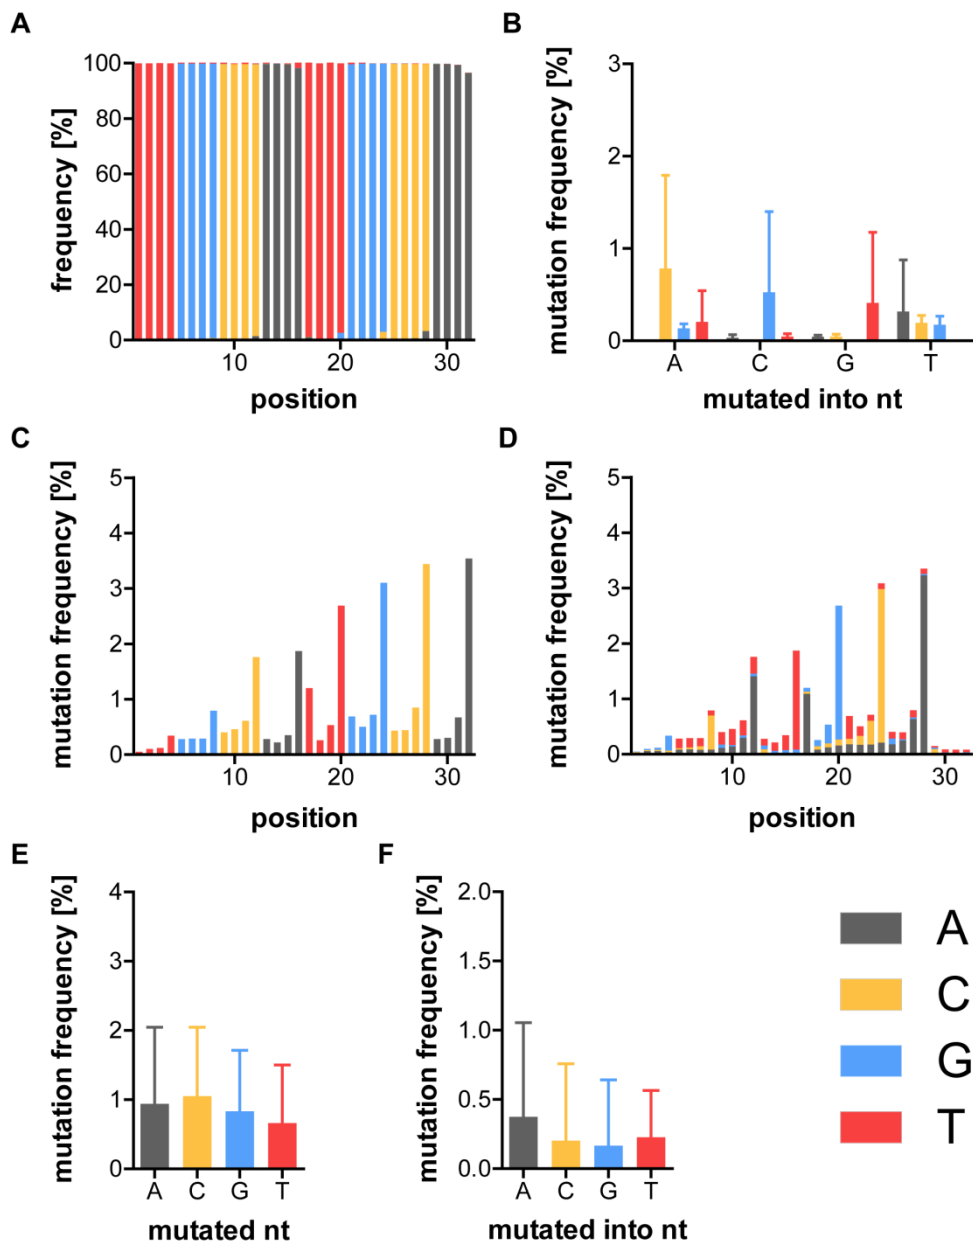

Figure S14: Mutation analysis of D3\_T4G4C4A4

(A) Frequency of the different nucleotides at all positions of the random region. (B) Frequencies with which one nucleotide (denoted by colour) mutates into another nucleotide (denoted on the x-axis). Depicted is the mean and SD. Mutation frequency at all positions of the random region of (C) the original nucleotide and (D) the nucleotide that has been mutated into. Mutation frequencies of the original nucleotides (E) and the nucleotides that has been mutated into (F). Depicted is the mean and SD.

Figure S15

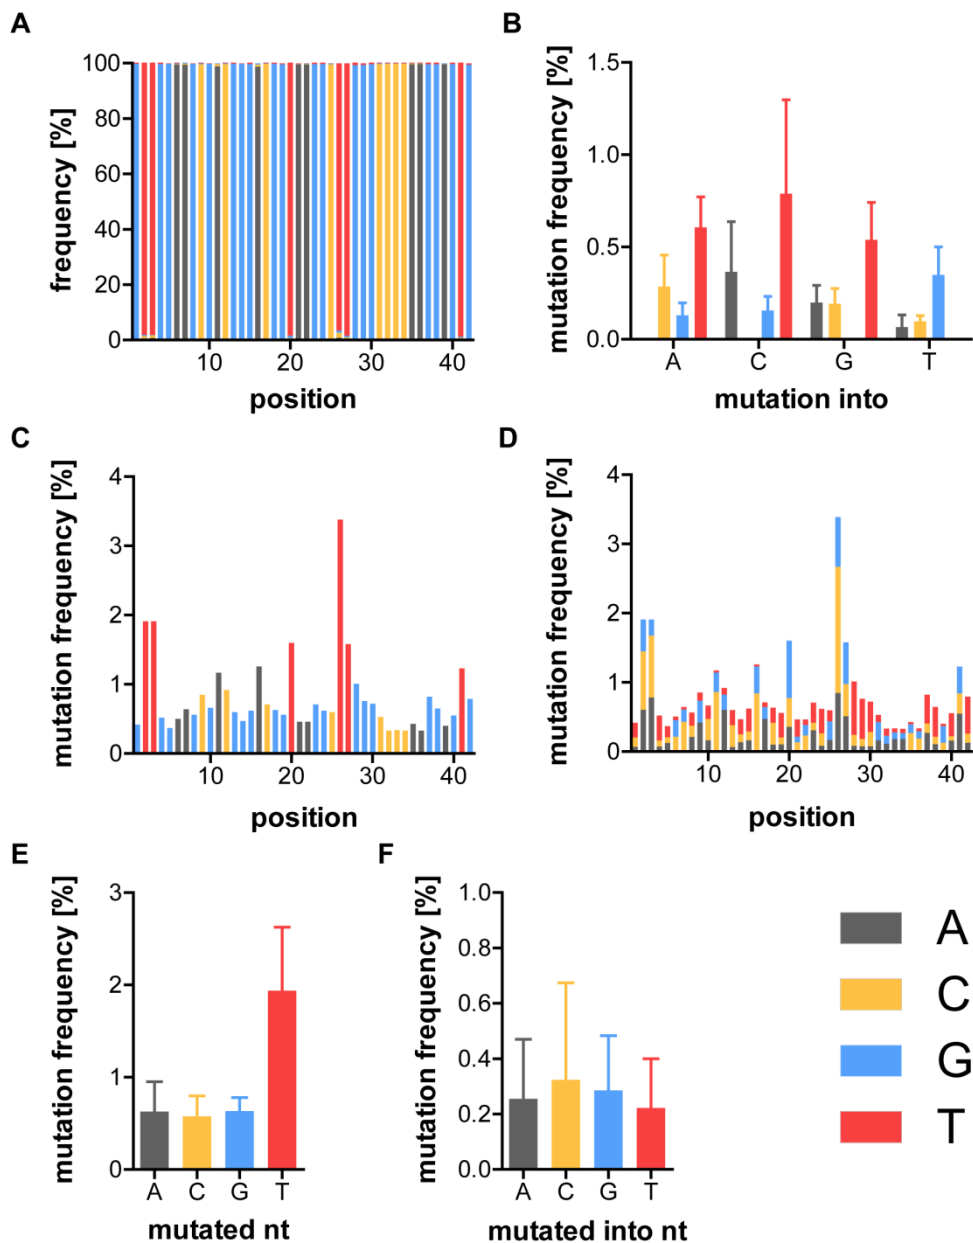

Figure S15: Mutation analysis of C12\_EdU after omission of shortened sequences

(A) Frequency of the different nucleotides at all positions of the random region. (B) Frequencies with which one nucleotide (denoted by colour) mutates into another nucleotide (denoted on the x-axis). Depicted is the mean and SD. Mutation frequency at all positions of the random region of (C) the original nucleotide and (D) the nucleotide that has been mutated into. Mutation frequencies of the original nucleotides (E) and the nucleotides that has been mutated into (F). Depicted is the mean and SD.



Figure S16

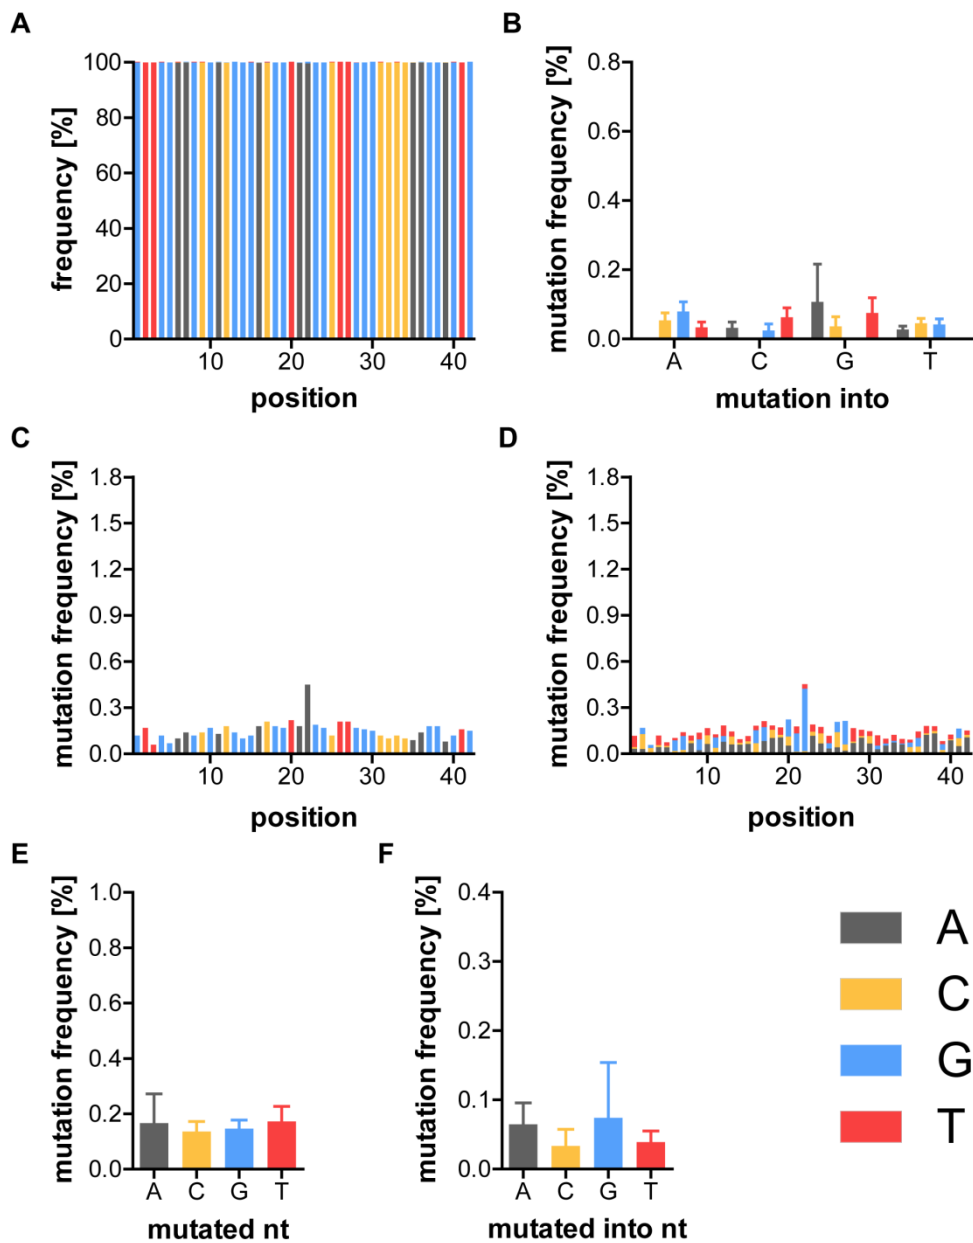

Figure S16: Mutation analysis of C12\_T\_PWO after omission of shortened sequences

(A) Frequency of the different nucleotides at all positions of the random region. (B) Frequencies with which one nucleotide (denoted by colour) mutates into another nucleotide (denoted on the x-axis). Depicted is the mean and SD. Mutation frequency at all positions of the random region of (C) the original nucleotide and (D) the nucleotide that has been mutated into. Mutation frequencies of the original nucleotides (E) and the nucleotides that has been mutated into (F). Depicted is the mean and SD.

Figure S17

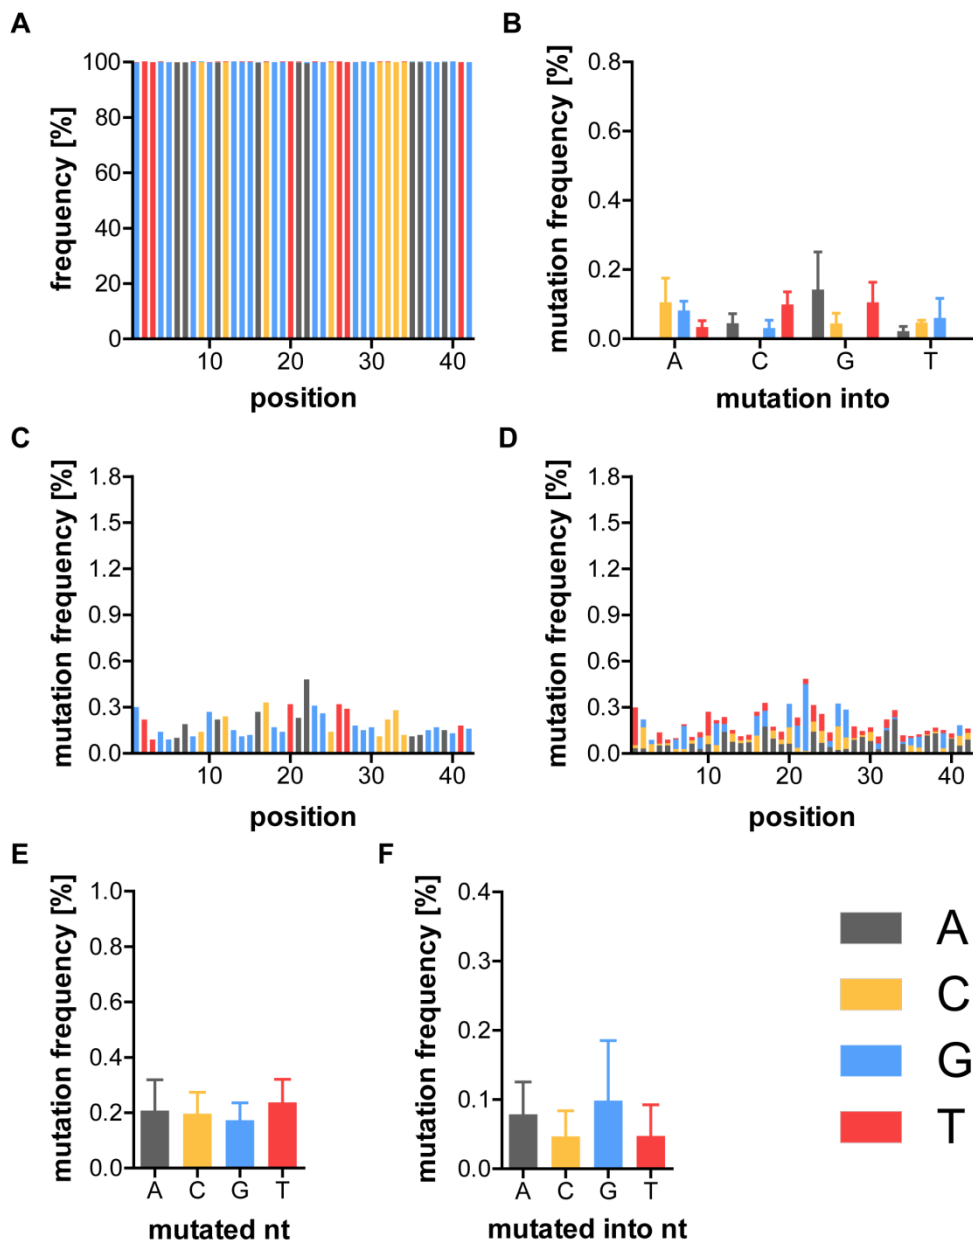

Figure S17: Mutation analysis of C12\_T\_PWO after omission of shortened sequences

(A) Frequency of the different nucleotides at all positions of the random region. (B) Frequencies with which one nucleotide (denoted by colour) mutates into another nucleotide (denoted on the x-axis). Depicted is the mean and SD. Mutation frequency at all positions of the random region of (C) the original nucleotide and (D) the nucleotide that has been mutated into. Mutation frequencies of the original nucleotides (E) and the nucleotides that has been mutated into (F). Depicted is the mean and SD.

Figure S18

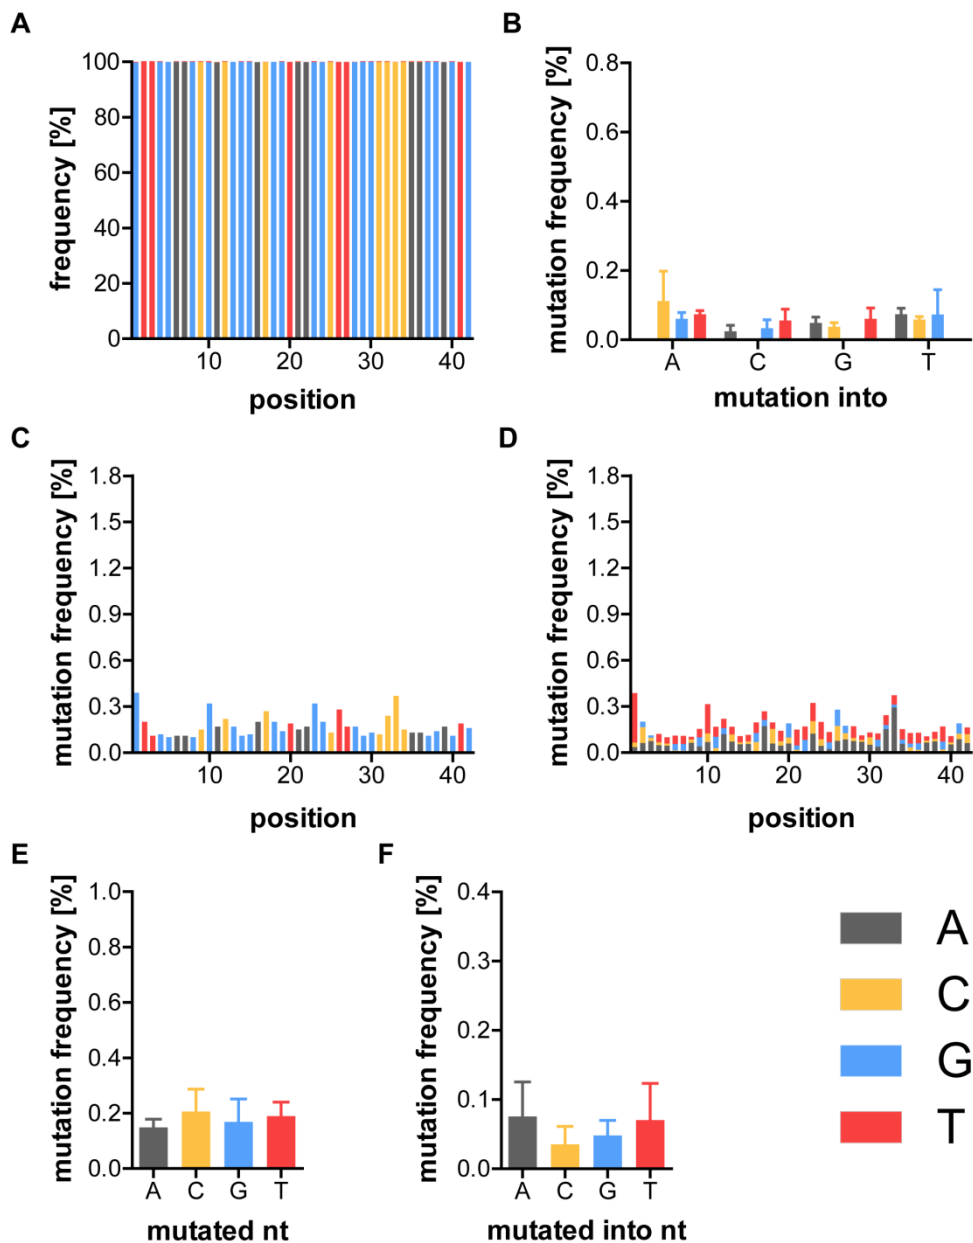

Figure S18: Mutation analysis of C12\_T\_w/o after omission of shortened sequences

(A) Frequency of the different nucleotides at all positions of the random region. (B) Frequencies with which one nucleotide (denoted by colour) mutates into another nucleotide (denoted on the x-axis). Depicted is the mean and SD. Mutation frequency at all positions of the random region of (C) the original nucleotide and (D) the nucleotide that has been mutated into. Mutation frequencies of the original nucleotides (E) and the nucleotides that has been mutated into (F). Depicted is the mean and SD.

**Figure S19**

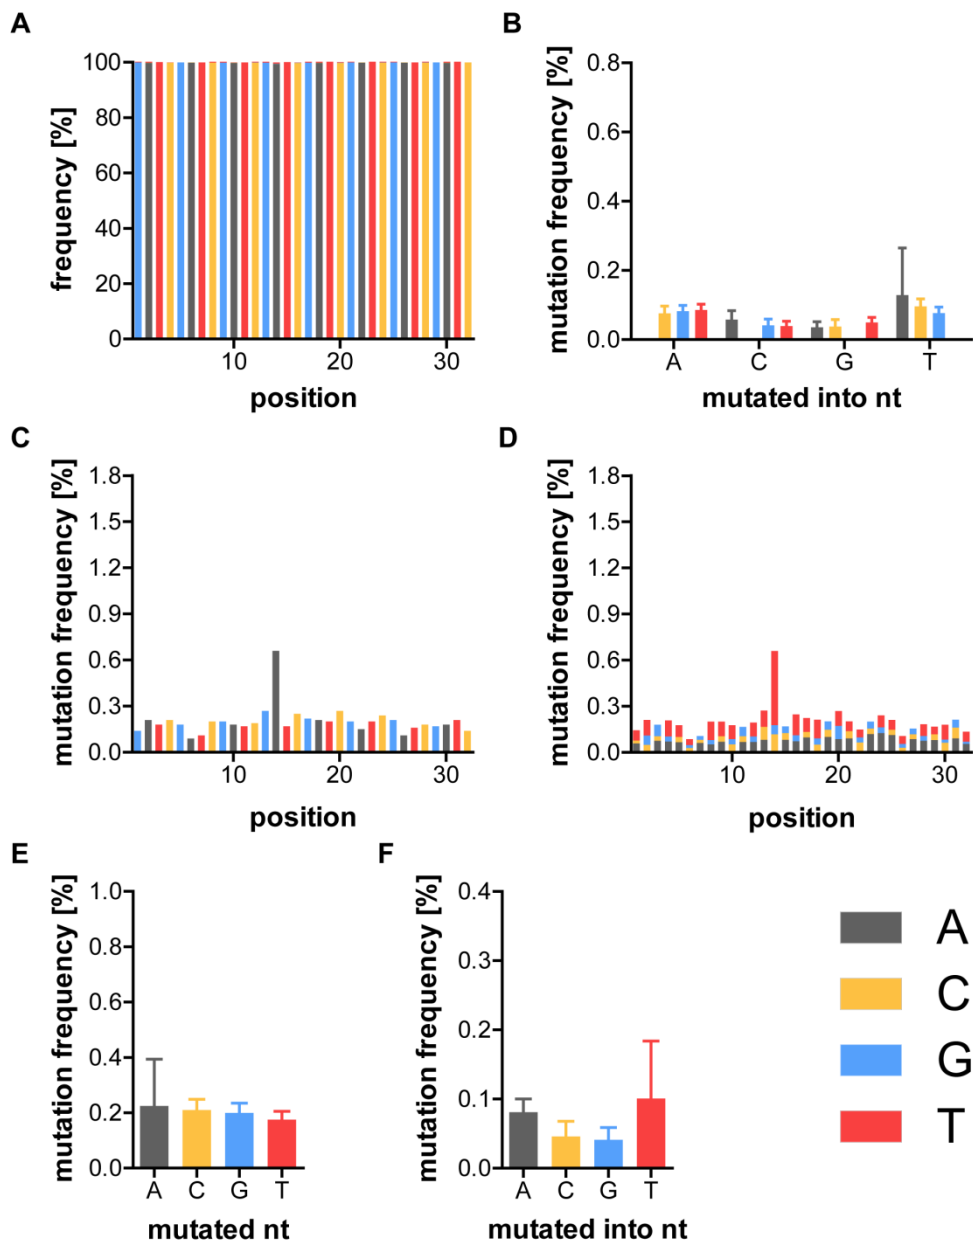

**Figure S19: Mutation analysis of FT2\_GATC after omission of shortened sequences**

(A) Frequency of the different nucleotides at all positions of the random region. (B) Frequencies with which one nucleotide (denoted by colour) mutates into another nucleotide (denoted on the x-axis). Depicted is the mean and SD. Mutation frequency at all positions of the random region of (C) the original nucleotide and (D) the nucleotide that has been mutated into. Mutation frequencies of the original nucleotides (E) and the nucleotides that has been mutated into (F). Depicted is the mean and SD.

Figure S20

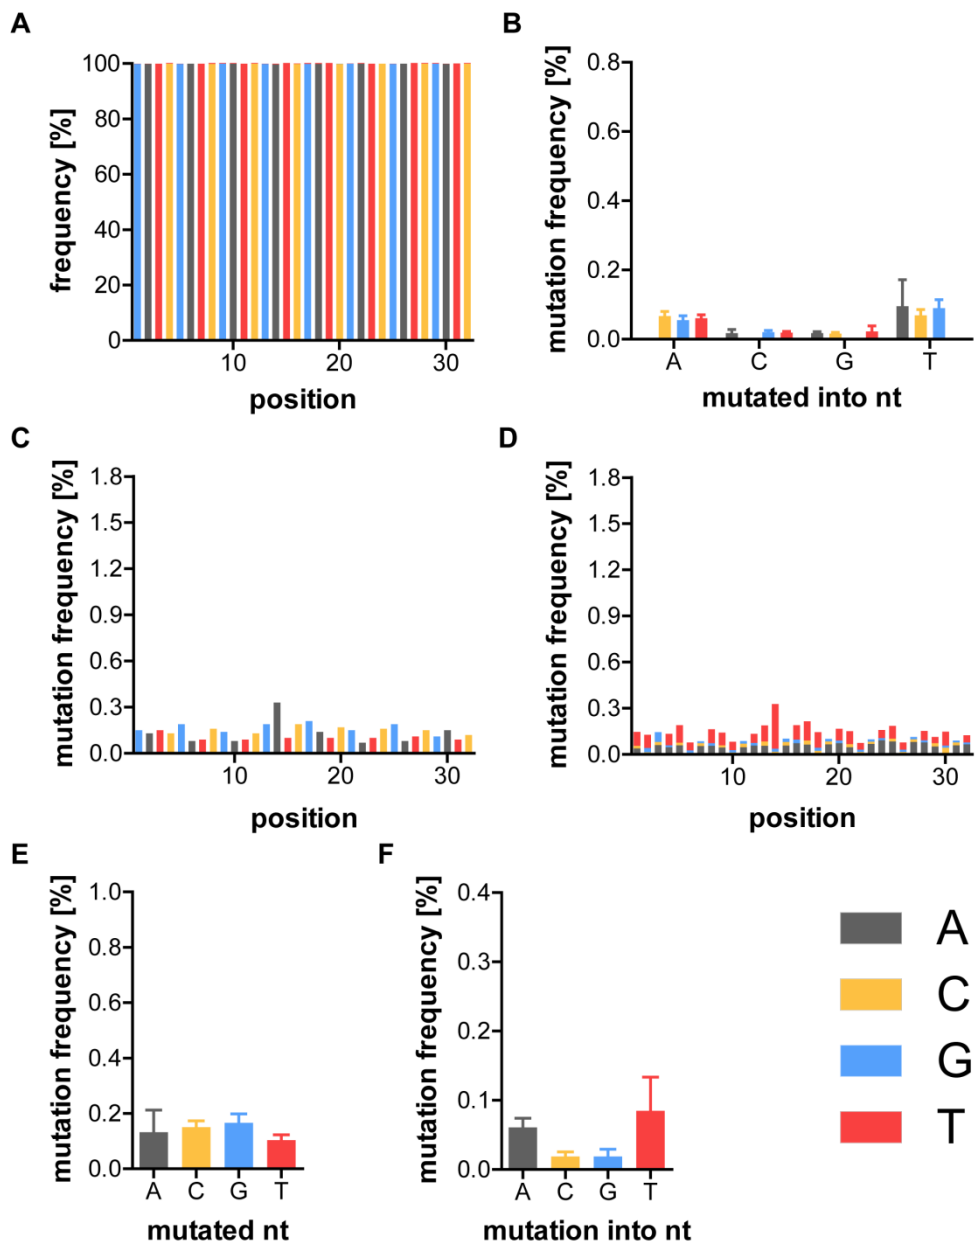

Figure S20: Mutation analysis of FT2\_GATC\_II after omission of shortened sequences

(A) Frequency of the different nucleotides at all positions of the random region. (B) Frequencies with which one nucleotide (denoted by colour) mutates into another nucleotide (denoted on the x-axis). Depicted is the mean and SD. Mutation frequency at all positions of the random region of (C) the original nucleotide and (D) the nucleotide that has been mutated into. Mutation frequencies of the original nucleotides (E) and the nucleotides that has been mutated into (F). Depicted is the mean and SD.

Figure S21

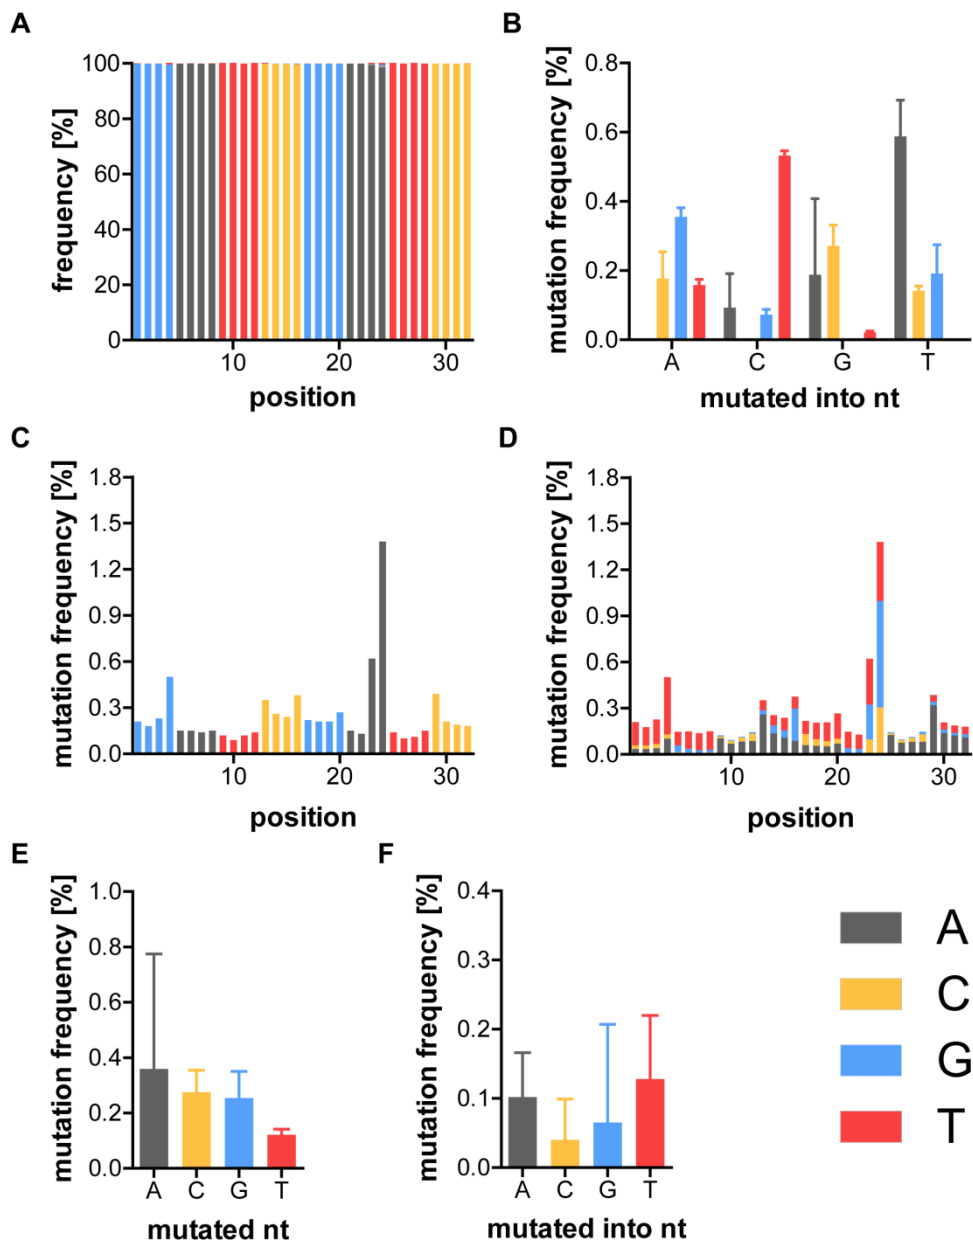

Figure S21: Mutation analysis of FT2\_G4A4T4C4 after omission of shortened sequences

(A) Frequency of the different nucleotides at all positions of the random region. (B) Frequencies with which one nucleotide (denoted by colour) mutates into another nucleotide (denoted on the x-axis). Depicted is the mean and SD. Mutation frequency at all positions of the random region of (C) the original nucleotide and (D) the nucleotide that has been mutated into. Mutation frequencies of the original nucleotides (E) and the nucleotides that has been mutated into (F). Depicted is the mean and SD.

Figure S22

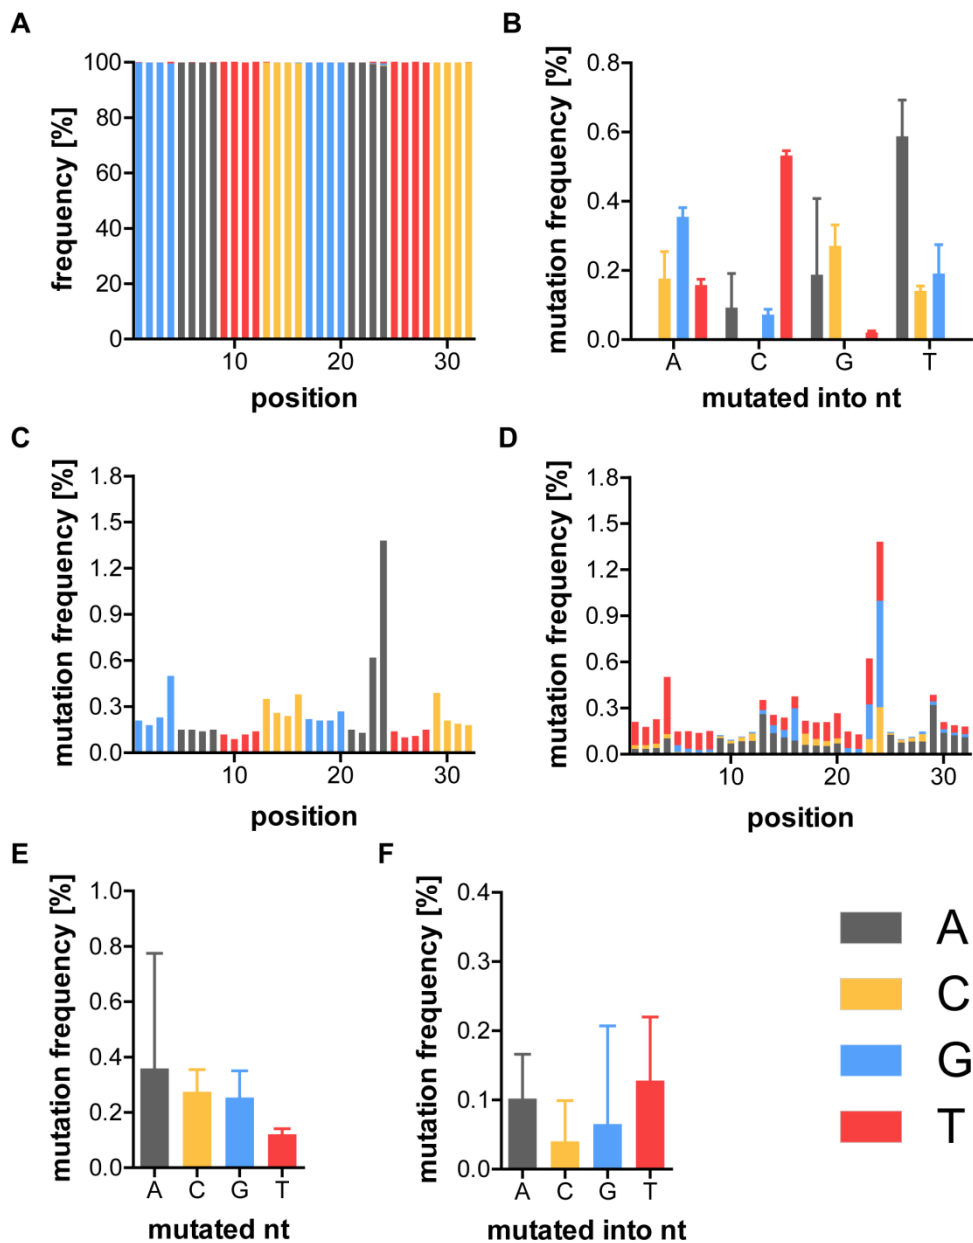

Figure S22: Mutation analysis of FT2\_G4A4T4C4\_II after omission of shortened sequences

(A) Frequency of the different nucleotides at all positions of the random region. (B) Frequencies with which one nucleotide (denoted by colour) mutates into another nucleotide (denoted on the x-axis). Depicted is the mean and SD. Mutation frequency at all positions of the random region of (C) the original nucleotide and (D) the nucleotide that has been mutated into. Mutation frequencies of the original nucleotides (E) and the nucleotides that has been mutated into (F). Depicted is the mean and SD.

Figure S23

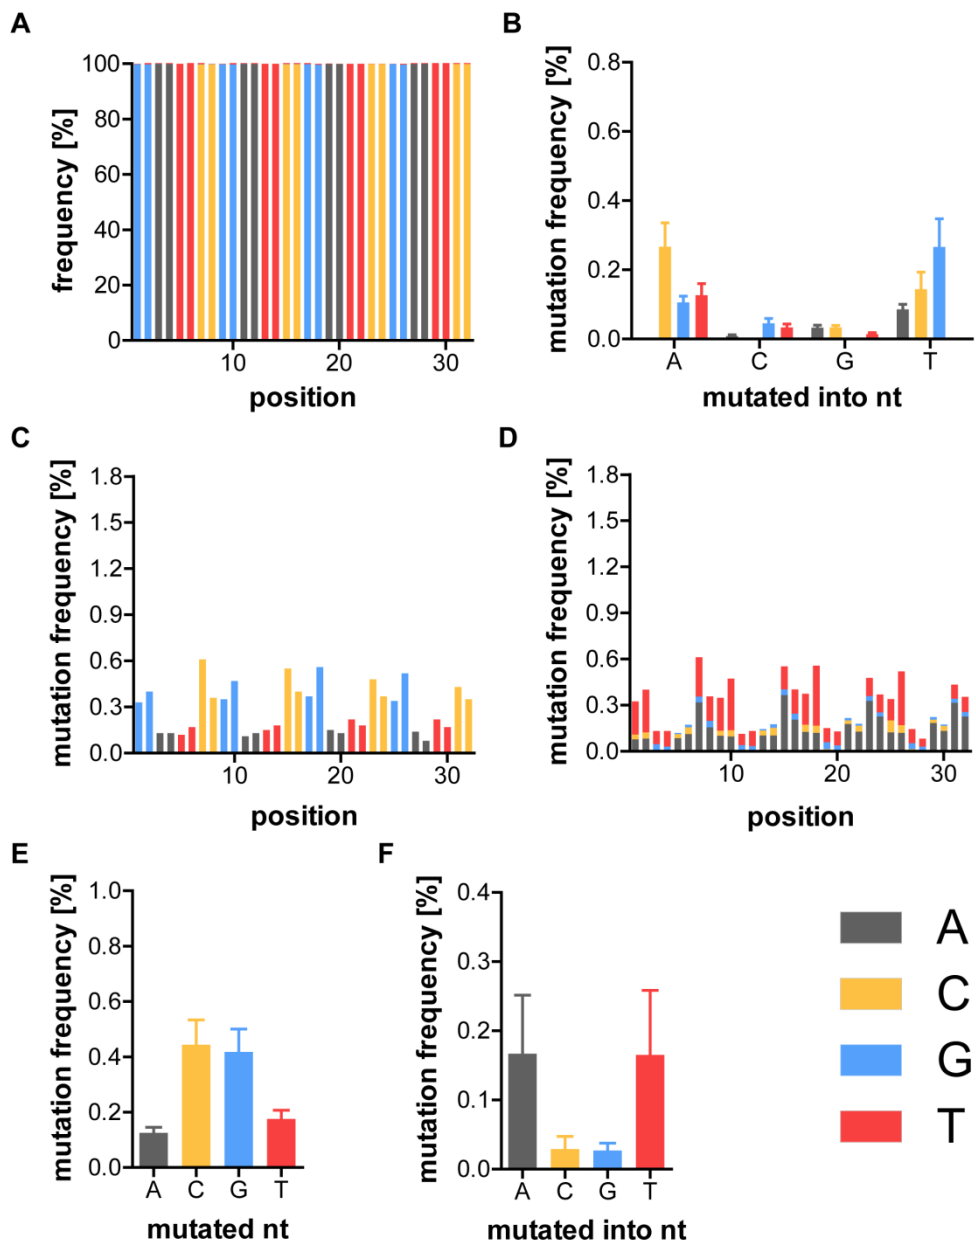

Figure S23: Mutation analysis of FT2\_G2A2T2C2 after omission of shortened sequences

(A) Frequency of the different nucleotides at all positions of the random region. (B) Frequencies with which one nucleotide (denoted by colour) mutates into another nucleotide (denoted on the x-axis). Depicted is the mean and SD. Mutation frequency at all positions of the random region of (C) the original nucleotide and (D) the nucleotide that has been mutated into. Mutation frequencies of the original nucleotides (E) and the nucleotides that has been mutated into (F). Depicted is the mean and SD.



Figure S24

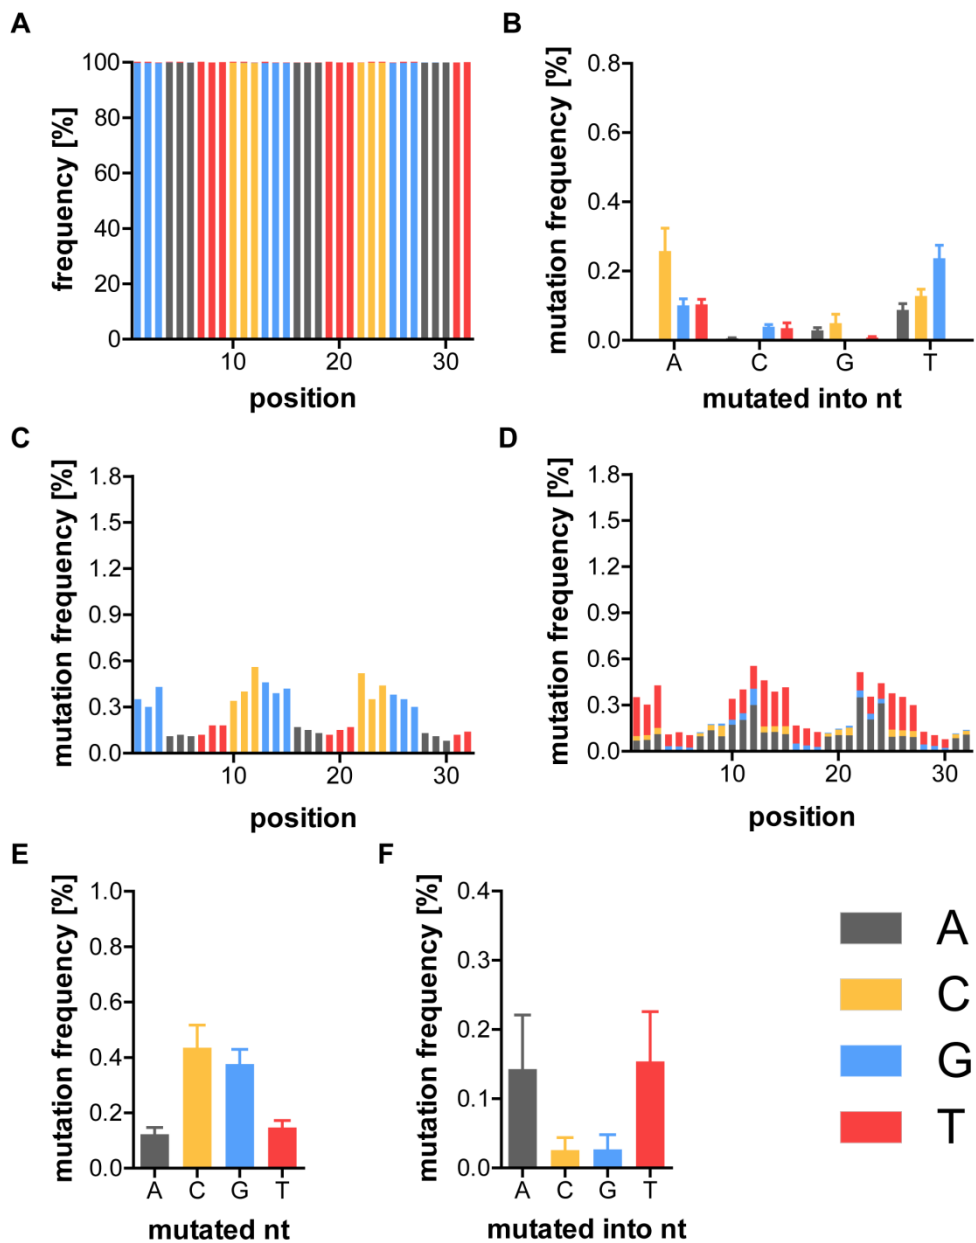

Figure S24: Mutation analysis of FT2\_G3A3T3C3 after omission of shortened sequences

(A) Frequency of the different nucleotides at all positions of the random region. (B) Frequencies with which one nucleotide (denoted by colour) mutates into another nucleotide (denoted on the x-axis). Depicted is the mean and SD. Mutation frequency at all positions of the random region of (C) the original nucleotide and (D) the nucleotide that has been mutated into. Mutation frequencies of the original nucleotides (E) and the nucleotides that has been mutated into (F). Depicted is the mean and SD.

Figure S25

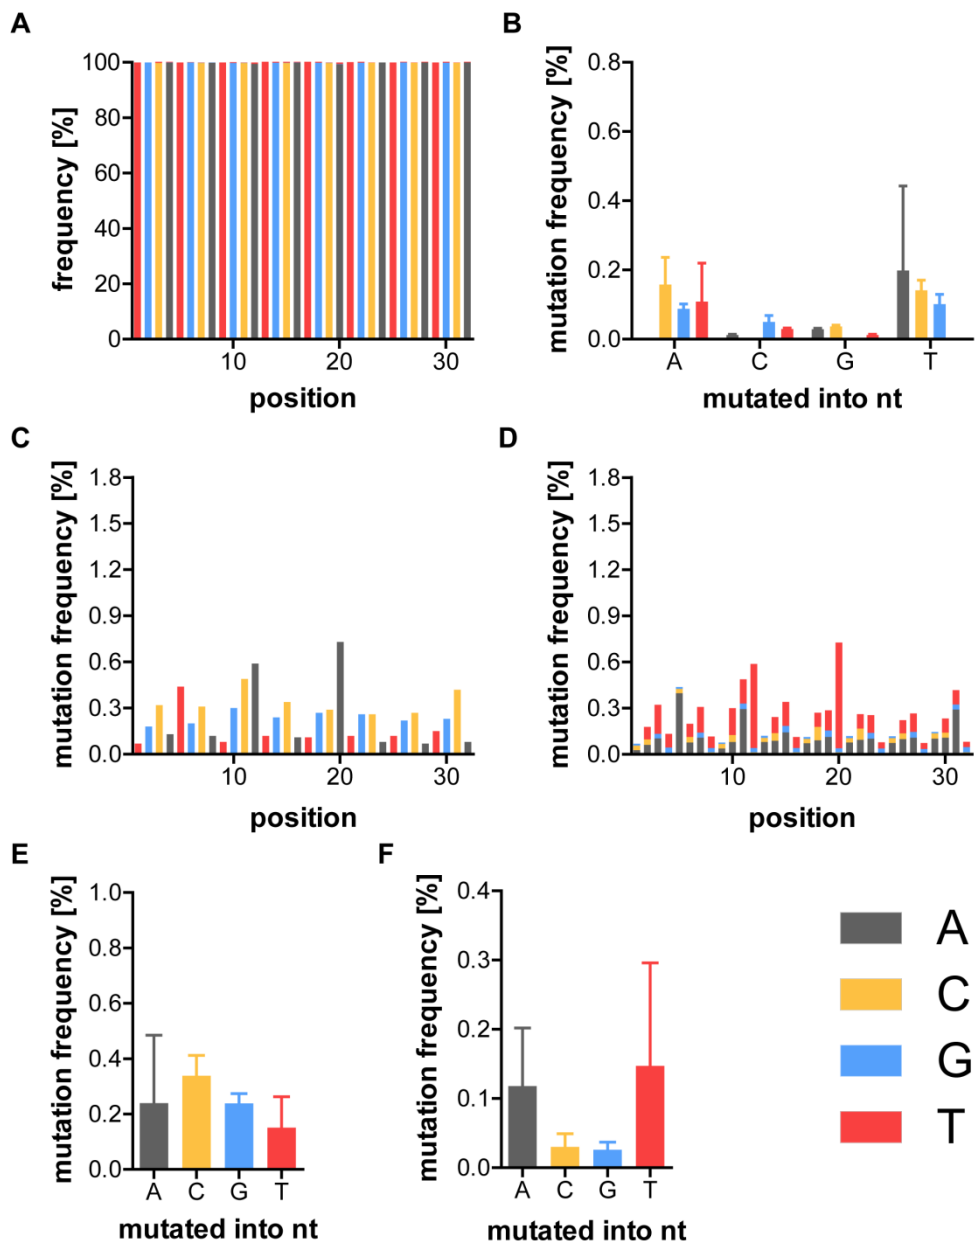

Figure S25: Mutation analysis of FT2\_TGCA after omission of shortened sequences

(A) Frequency of the different nucleotides at all positions of the random region. (B) Frequencies with which one nucleotide (denoted by colour) mutates into another nucleotide (denoted on the x-axis). Depicted is the mean and SD. Mutation frequency at all positions of the random region of (C) the original nucleotide and (D) the nucleotide that has been mutated into. Mutation frequencies of the original nucleotides (E) and the nucleotides that has been mutated into (F). Depicted is the mean and SD.

Figure S26

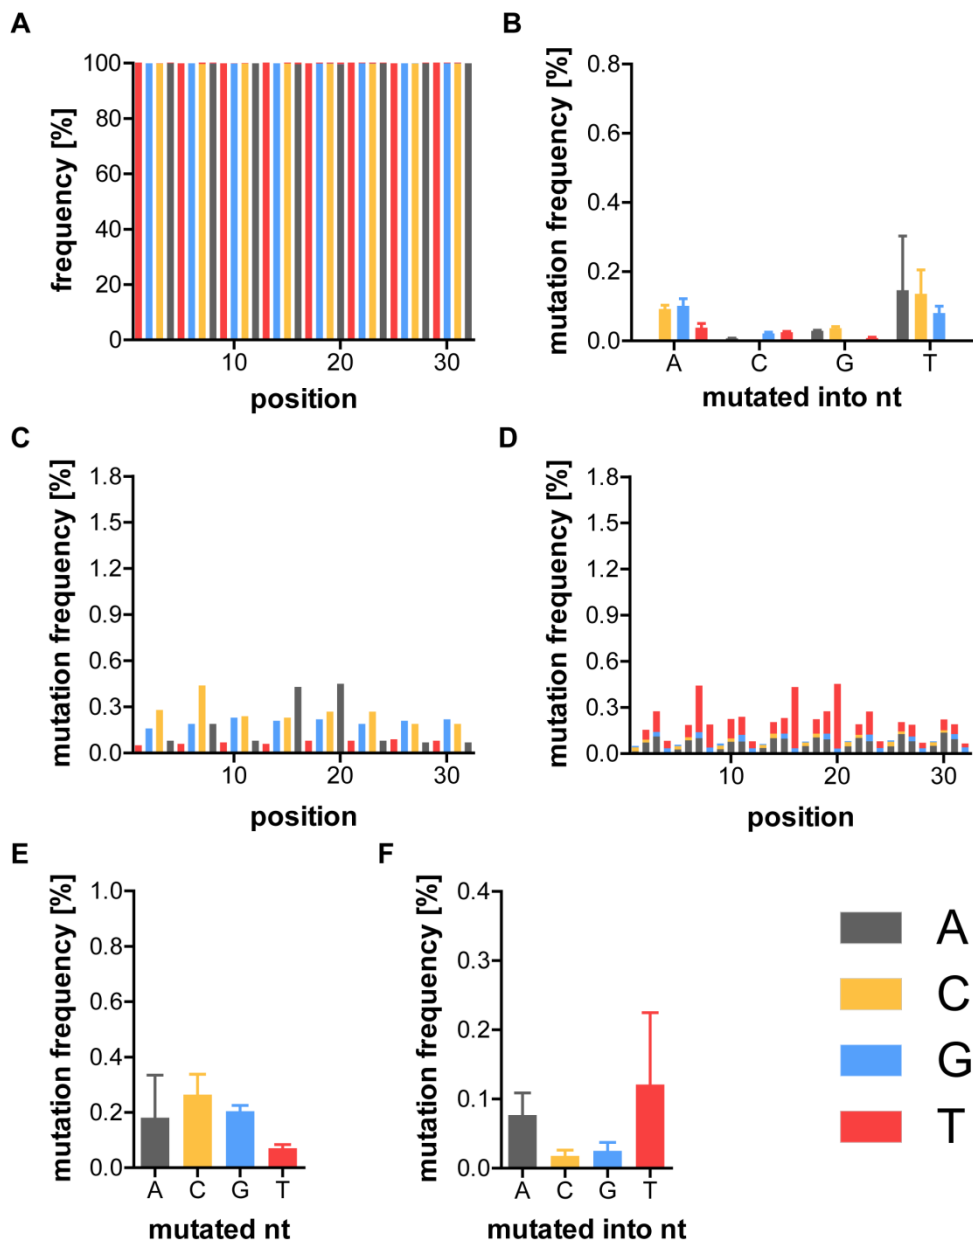

Figure S26: Mutation analysis of D3-TGCA after omission of shortened sequences

(A) Frequency of the different nucleotides at all positions of the random region. (B) Frequencies with which one nucleotide (denoted by colour) mutates into another nucleotide (denoted on the x-axis). Depicted is the mean and SD. Mutation frequency at all positions of the random region of (C) the original nucleotide and (D) the nucleotide that has been mutated into. Mutation frequencies of the original nucleotides (E) and the nucleotides that has been mutated into (F). Depicted is the mean and SD.

Figure S27

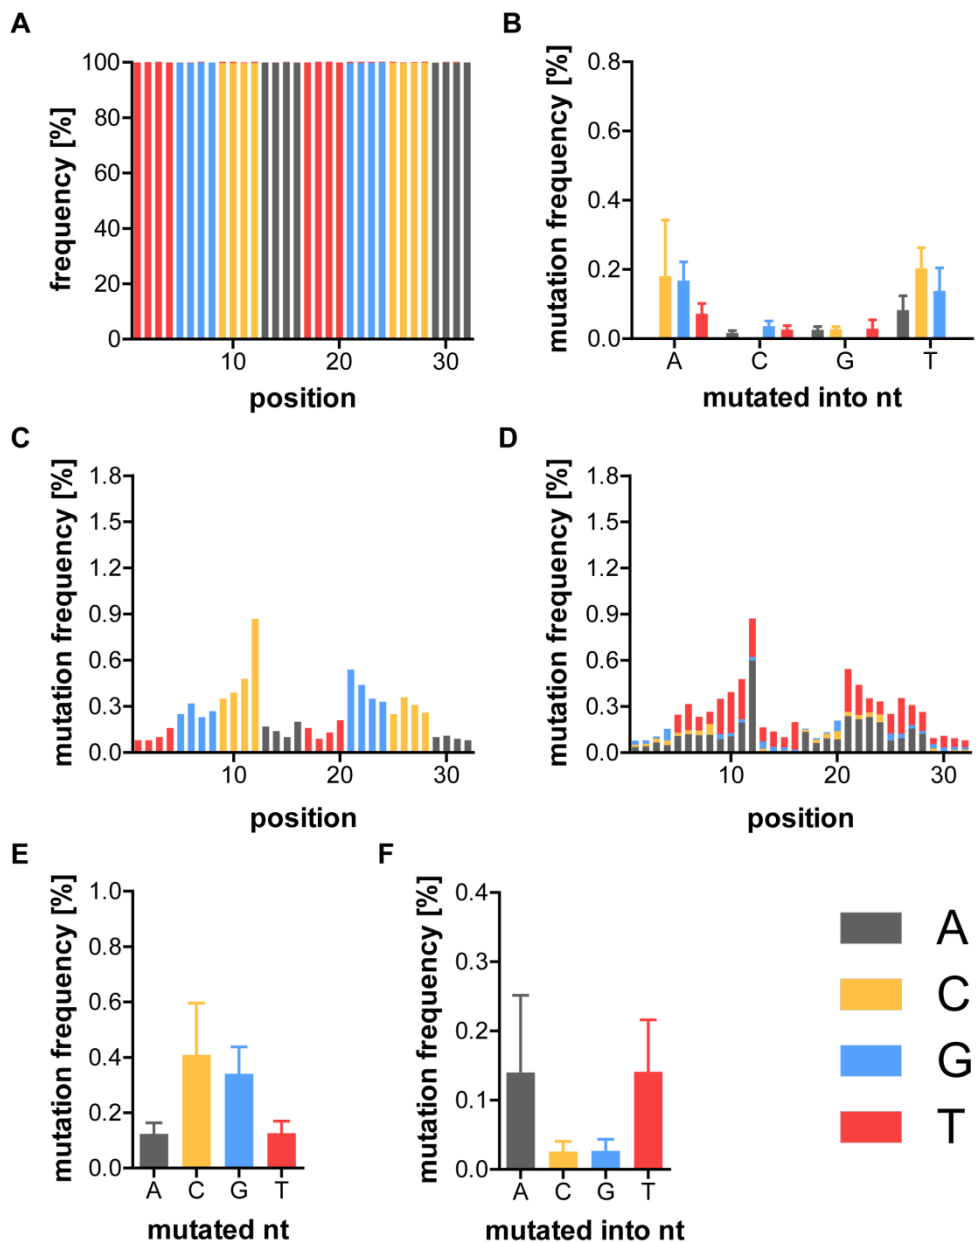

Figure S27: Mutation analysis of FT2-T4G4C4A4 after omission of shortened sequences

(A) Frequency of the different nucleotides at all positions of the random region. (B) Frequencies with which one nucleotide (denoted by colour) mutates into another nucleotide (denoted on the x-axis). Depicted is the mean and SD. Mutation frequency at all positions of the random region of (C) the original nucleotide and (D) the nucleotide that has been mutated into. Mutation frequencies of the original nucleotides (E) and the nucleotides that has been mutated into (F). Depicted is the mean and SD.

Figure S28

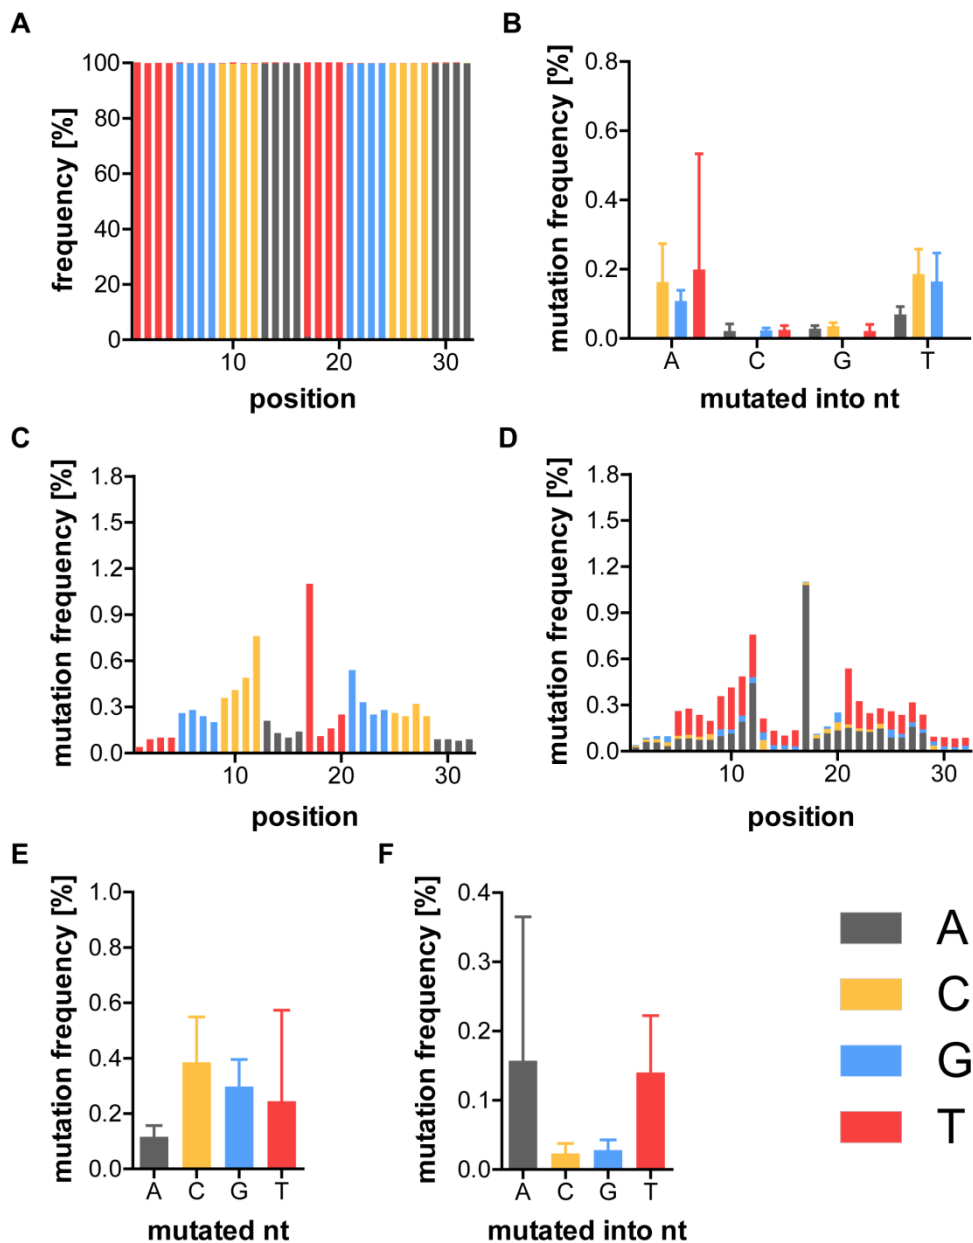

Figure S28: Mutation analysis of D3-T4G4C4A4 after omission of shortened sequences

(A) Frequency of the different nucleotides at all positions of the random region. (B) Frequencies with which one nucleotide (denoted by colour) mutates into another nucleotide (denoted on the x-axis). Depicted is the mean and SD. Mutation frequency at all positions of the random region of (C) the original nucleotide and (D) the nucleotide that has been mutated into. Mutation frequencies of the original nucleotides (E) and the nucleotides that has been mutated into (F). Depicted is the mean and SD.
